# **DHX30 coordinates cytoplasmic translation and mitochondrial function contributing to cancer cell survival**

Bartolomeo Bosco<sup>1</sup>, Annalisa Rossi<sup>1</sup>, Dario Rizzotto<sup>1^</sup>, Sebastiano Giorgetta<sup>1</sup>, Alicia Perzolli<sup>1</sup>, Francesco Bonollo<sup>1</sup>, Angeline Gaucherot<sup>2</sup>, Frédéric Catez<sup>2</sup>, Jean-Jacques Diaz<sup>2</sup>, Erik Dassi<sup>1#</sup>, Alberto Inga<sup>1#</sup>

<sup>1</sup>Department of Cellular, Computational and Integrative Biology, CIBIO, University of Trento, via Sommarive 9, 38123, Trento, Italy

<sup>2</sup>Inserm U1052, CNRS UMR5286 Centre de Recherche en Cancérologie de Lyon, F-69000 Lyon, France. Centre Léon Bérard, F-69008 Lyon, France, Université de Lyon 1, F-69000 Lyon, France

<sup>^</sup>present address: CeMM Research Center for Molecular Medicine of the Austrian Academy of Sciences, Vienna, Austria

#corresponding authors:

[erik.dassi@unitn.it](mailto:erik.dassi@unitn.it)

[alberto.inga@unitn.it](mailto:alberto.inga@unitn.it)

Running title: DHX30 controls global translation

Keywords: DHX30, translation efficiency, polysomal profiling, mitoribosome, ribosome biogenesis, RNA binding proteins

## Abstract

DHX30 was recently implicated in the translation control of mRNAs involved in p53-dependent apoptosis. Here we show that DHX30 exhibits a more general function by integrating the activities of its cytoplasmic isoform and of the more abundant mitochondrial one. The depletion of both DHX30 isoforms in HCT116 cells leads to constitutive changes in polysome-associated mRNAs, enhancing the translation of mRNAs coding for cytoplasmic ribosomal proteins while reducing the translational efficiency of the nuclear-encoded mitoribosome mRNAs. Furthermore, depletion of both DHX30 isoforms exhibits higher global translation but slower proliferation, and reduced mitochondrial energy metabolism. Isoform-specific silencing established a role for cytoplasmic DHX30 in modulating global translation. The impact on global translation and proliferation were confirmed in U2OS and MCF7 cells, although the effect of DHX30 depletion on mitochondrial gene expression was observed only in MCF7 cells. Exploiting RIP, eCLIP, and gene expression data, we identified a gene signature comprising DHX30 and fourteen mitoribosome transcripts that we candidate as direct targets: this signature shows prognostic value in several TCGA cancer types, with higher expression associated with reduced overall survival. We propose that DHX30 contributes to cell homeostasis by coordinating ribosome biogenesis, global translation, and mitochondrial metabolism. Targeting DHX30 could, thus, expose a vulnerability in cancer cells.

## Author summary

Translation occurs in the cell both through cytoplasmic and mitochondrial ribosomes, respectively translating mRNAs encoded by the nuclear and the mitochondrial genome. Here we found that DHX30, an RNA-binding protein implicated in p53-dependent apoptosis, enhances the translation of mRNAs coding for cytoplasmic ribosomal proteins while reducing that of the mitoribosome mRNAs when silenced. This coordination of the cytoplasmic and mitochondrial translation machineries affected both cell proliferation and energy metabolism, suggesting an important role for this mechanism in determining the fitness of cancer cells. Indeed, the analysis of publicly available cancer datasets led us to define a 15-genes signature that is able to affect the prognosis of a subset of cancer types. In this subset, we found that higher expression of the genes composing

the signature is associated with a worse prognosis. We thus propose DHX30 as a potential vulnerability in cancer cells, that could be targeted to develop novel therapeutic strategies.

## Introduction

The DHX30 RNA binding protein (RBP) is an ATP-dependent RNA helicase highly expressed in neural cells and somites during embryogenesis in mice. It plays an important role in development and its homozygous deletion is lethal for embryos [1]. In humans, DHX30 is involved in the antiviral function of the zinc-finger ZAP protein. Indeed, it was demonstrated that these two proteins directly interact with each other via the N-terminal domain and that DHX30 is necessary for the optimal antiviral activity of ZAP [2]. Recently, six de novo missense mutations were identified in DHX30 in twelve unrelated patients affected by global developmental delay (GDD), intellectual disability (ID), severe speech impairment and gait abnormalities [3]. All mutations caused amino acid changes in the highly conserved helicase motif, impairing the protein's ATPase activity or RNA recognition. Moreover, overexpression of those DHX30 mutants led to increased propensity to trigger stress granules (SG) formation and decreased global translation [3]. It was shown that DHX30 could play an important role also in human fibroblast and osteosarcoma mitochondria. Indeed, in that compartment it interacts with a Fas-activated serine-threonine kinase (FASTKD2), modulating mitochondrial ribosome maturation and assembly [4]. Our group and collaborators recently compared p53-mediated responses to Nutlin-3 treatment in three different cancer cell lines: HCT116, SJSA1 and MCF7 [5,6]. It was observed that p53 activation caused cell cycle arrest in HCT116, massive apoptosis in SJSA1 and an intermediate phenotype in MCF7, consistent with earlier reports [7]. By analyzing the cell lines' translomes (i.e. transcripts loaded on polysomes and in active translation), we discovered that only 0.2% of the genes were commonly differentially expressed (DEGs). Furthermore, the polysome profiling of SJSA1 revealed an enrichment of pro-apoptotic transcripts [6] in the fraction corresponding to polysomes. Those featured instances of a specific cis-element in their 3'UTR, labeled as CGPD, standing for CG-rich motif for p53-dependent death. The DExH box RNA helicase DHX30 was found to be one RBP whose binding to the CGPD motif correlated with a specific cell fate. Indeed, DHX30 was expressed at higher levels in HCT116 than SJSA1,

resulting in a lower translation of GCPD-motif-containing transcripts in HCT116 cells. Depletion of DHX30 in HCT116 by stable shRNA increased the translation potential of mRNAs containing the CGPD motif, resulting in higher levels of apoptosis after p53 activation by Nutlin treatment, mimicking in part the apoptotic phenotype of SJSA1 [6].

In this work, we set to determine the broader phenotypic role of DHX30 in the colorectal cancer cell line HCT116. By virtue of two alternative promoters leading to the production isoforms containing or not a mitochondrial localization signal, DHX30 can couple mitochondrial function, ribosome biogenesis and global translation. Depleting DHX30 in HCT116 cells reduced cell proliferation and sensitised cells to small molecules targeting mitochondrial function. Results were extended to two different cancer cell models and their implications explored using TCGA data.

## Results

### *DHX30 depletion enhances translation in HCT116 cells*

We previously identified DHX30 as a negative modulator of p53-dependent apoptosis, performing polysomal profiling followed by RNA-seq of HCT116 cells clones stably depleted for DHX30 and treated with the MDM2 inhibitor Nutlin-3 [7]. Here we reanalyzed this dataset (GSE95024), complementing it by performing a total-cytoplasmic RNA profiling of the same cells by RNA-seq (GSE154065), and focusing on the comparison between DHX30-depleted (shDHX30) and control (shNT) HCT116 cells in the untreated control.

We compared the gene expression changes at the polysomal or total cytoplasmic RNA levels and performed a gene set enrichment analysis [8]. This revealed an increased abundance of ribosomal proteins and ribosome biogenesis genes in shDHX30 cells, only at the polysomal level (**Figure 1A**, **Table S1**). Consistently, analysis of translation efficiency (TE), measured as the ratio between relative RNA abundance in polysomal and total cytoplasmic fractions, revealed that DHX30 depletion is associated with higher TE for transcripts coding for ribosomal protein subunits (RPL, RPS, **Figure 1B**). On the other end, nuclear transcripts coding mitochondrial ribosomal proteins exhibited reduced TE in DHX30-depleted cells, despite showing higher constitutive TE compared to the cytoplasmic ribosomal transcripts (mRPL, mRPS, **Figure 1B**). Validation by qPCR was performed for four RPs and four MRPs transcripts (**Figure S1A**). The basal

differences in TE between ribosome and mitoribosome transcripts was confirmed in all cases, and for five of them results reproduced the effect of DHX30 depletion on TE that was observed from the RNA-seq data. A trend for higher expression of RPL and RPS transcripts and lower expression of MRPL and MRPS transcripts in DHX30-depleted cells was also apparent (**Figure S1B**). We thus sought to understand if DHX30 could be directly regulating this class of genes and exploited the data of DHX30 eCLIP assay performed in K562 cells as part of the ENCODE project [9]. Despite the different cell line, the eCLIP data indicate that DHX30 can bind 67 ribosomal (36 RPLs and 31 RPSs) and 23 mitoribosomal (16 MRPLs and 7 MRPSs) protein transcripts (**Table S1**) [9].

Consistent with the higher TE for RPL and RPS transcripts, DHX30 depletion in HCT116 cells was associated with higher relative amounts of ribosomes extracted and quantified from a sucrose cushion (**Figure 1C**), and higher rRNA levels (**Figure 1D, E**). Furthermore, DHX30-depleted cells not only showed evidence of increased ribosome biogenesis, but also of higher global translation (**Figure 1F, 1G**). The higher global translation does not appear to be related to an increase in MYC expression or activity (**Figure S1C**), nor to a significant increase in the activity mTOR pathway (**Figure S1D**). Finally, DHX30 protein was found to be associated with ribosomal subunits, 80S monosomes as well as with low molecular-weight polysomes in HCT116, MCF7 and U2OS cells (**Figure S1F**).

Hence, DHX30 appears to negatively influence ribosome biogenesis, global translation and also the translation of specific mRNAs. It is important to emphasize that these are not necessarily dissociated events, as a change in ribosome number could be sufficient to impact on translation specificity [10].

#### *DHX30 depletion alters the expression of mitoribosomal transcripts*

The impact of DHX30 depletion on the expression and translation efficiency of nuclear-encoded mitoribosomal proteins caught our attention, as it showed the opposite trend compared to ribosomal protein transcripts (**Figure 1B, Figure S1**). First, we established the potential for DHX30 to bind to mitoribosomal protein transcripts by RIP assays, choosing MRPL11 (UL11m), that was previously evaluated in cancer cells [3], and MRPS22 (mS22), as a representative of the large and small subunits, respectively (**Figure 2A**). Next, we observed that DHX30-depleted cells showed reduced expression of these two genes at both the RNA and protein levels (**Figure 2B, C**). These findings suggest that DHX30 directly promotes stability

and/or translation of mitoribosome transcripts. The modulation of mitoribosome proteins expression might impact on mitochondrial translation and contribute to the functions described for DHX30 in the mitochondrial matrix [4,11]. Notably, the DHX30 gene contains two promoters, and the transcript resulting from the internal, more 3'- one (ENST00000457607.1) includes an alternative first exon that contains a predicted mitochondrial targeting sequence [12,13]. Mitochondrial localization of the protein was confirmed by immunofluorescence (**Figure 2D**), consistent with previous results in human fibroblasts [4] and APEX-seq data [14]. We checked the relative levels of the DHX30 transcripts from the two promoters and found the putative mitochondrial isoform to be about four times more abundant (**Figure 2E**), as indicated also by western blot analysis on extracts of mitochondrial and cytoplasmic fractions (**Figure 2F**).

Stable DHX30-silencing was obtained using three different shRNAs [6] that targeted both cytoplasmic and mitochondrial transcripts (from here on labeled cDHX30 and mDHX30) (**Figure S2A**), and isolating single clones. To confirm results, we also employed transient silencing using one siRNA specific for cDHX30 (labeled siDHX30-C) or an siRNA targeting transcripts from both promoters (labeled siDHX30-C+M). The activity and specificity of the two siRNAs was assessed by qRT-PCR 48 and 96 hours post-silencing (**Figure S2B**, **Figure 3A**). Transient silencing of just cDHX30 or both cDHX30 and mDHX30 for 96 hours led to an increase in global translation (**Figure 3B**) that was not associated with an increase in the activity mTOR pathway (**Figure S1E**), thus confirming the observations obtained with the different stable clones, but indicating that cDHX30 modulates global translation.

Transient silencing of both cDHX30 and mDHX30 resulted in a reduction of the expression of MRPL11 and MRPS22 (**Figure 3C, D**) similar to what we previously observed with stable depletion of both isoforms (Figure 2), while cDHX30 silencing was ineffective, considering the results at both RNA and protein levels.

DHX30 stable or transient silencing was extended to U2OS, osteosarcoma-derived cells that express relatively high levels of DHX30 (**Figure S2C, S2D**). Stable depletion of both cDHX30 and mDHX30 was associated with a significant reduction of MRPL11 (RNA and protein) and of MRPS22 mRNA expression (**Figure S2E, S2F**), while transient depletion by siRNAs did not significantly impact on the expression of the two mitoribosome transcripts (**Figure S2G**), although MRPL11 protein levels were reduced by siDHX30-C+M (**Figure S2H**).

Transient silencing of both cDHX30 and mDHX30 was also performed in the breast cancer-derived MCF7 cells (**Figure S3A**) and led to a reduction in the expression of both MRPL11 and MRPS22 mRNAs (**Figure S3B**), although only for MRPL11 the effect was consistent also at protein level (**Figure S3C**). Cytoplasmic DHX30 transient silencing in U2OS and MCF7 also led to higher global translation, confirming the results obtained in HCT116 cells (**Figure S3D, S3E**).

#### *DHX30 depletion impacts mitochondrial gene expression and function*

We next focused on the expression of mitochondrially encoded genes. First of all, we established that DHX30 depletion did not impact on the number of mitochondrial genomes by digital PCR in HCT116 cells (**Figure 4A**). Instead, the expression of several mitochondrially encoded transcripts was significantly reduced (**Figure 4B**). The steady-state expression of two mitochondrially encoded proteins, MT-ATP6 and MT-ATP8, was investigated and shown to be reduced in HCT116\_shDHX30 cells (**Figure 4C, S3F**). We pursued the same analysis after transient silencing, confirming the lower expression of mitochondrially encoded genes at the RNA and protein levels, but only when the DHX30 mitochondrial variant (siDHX30-C+M) was silenced and analysed 96 hours post silencing (**Figure 4D, 4E**). In fact, although DHX30 depletion was visible already after 48 hours (**Figure S2B**) from the addition of the siRNAs, more time was needed to appreciate a reduction in the expression of mitochondrially encoded genes. The expression of mitochondrially encoded genes was checked also after DHX30 silencing in U2OS and MCF7 cells (**Figure S4**). In U2OS\_shDHX30 cells, all of the tested transcripts, with the exception of MT-ND6, were down-modulated compared to the U2OS\_shNT control (**Figure S4A, left panel**). Instead, none of the seven tested transcripts were down-modulated by transient DHX30 silencing, regardless of the siRNA used (**Figure S4A, right panel**). In fact, three of them were slightly upregulated. This latter result is consistent with the observation of a slightly lower efficacy of DHX30 depletion by siRNAs and with the lack of an impact on MRPL11 or MRPS22 expression (**Figure S2**). MT-ATP6 was also examined by western blot and its amount was reduced in U2OS\_shDHX30 cells (**Figure S4C**), but not in U2OS cells that were transiently silenced for DHX30 (**Figure S4D**). Transient DHX30 depletion (by siDHX30 C+M) in MCF7 cells led to a significant reduction in the expression of all tested mitochondrial transcripts, although for MT-ATP6 the reduction was not significant at protein levels (**Figure S4B, S4E**).



Finally, we evaluated markers of carbon metabolism and mitochondrial respiration capacity by an Agilent SeahorseXF real-time analyzer. HCT116\_shDHX30 cells had a significantly lower basal oxygen consumption rate compared to the control cell line. Notably, DHX30-depleted cells did not show compensatory glycolysis in basal culture condition, not even when we chemically abolished mitochondrial respiration. We indeed observed a lower compensatory glycolysis compared with the control (**Figure 4F**). These results suggest that HCT116\_shDHX30 cells do not show a typical Warburg effect [15], and are expected to produce less energy due to reduced mitochondrial respiration. Collectively, the depletion of DHX30 seems to generate an imbalance in cell homeostasis, with higher demand of chemical energy from ribosome biogenesis and cytoplasmic translation but lower mitochondrial activity.

#### *DHX30 depletion impaired cell proliferation rate and increased apoptosis proneness.*

Next, we characterized the phenotypic impact of DHX30 depletion in HCT116. Consistent with the lower mitochondrial oxygen consumption rate, HCT116\_shDHX30 cells showed a significantly lower proliferation rate compared to the control cell clone. This was observed by colony formation assay and confirmed through time-course proliferation by cell count via high-content microscopy or using a Real-Time Cell Analyzer xCELLigence (**Figure 5A-C**). Interestingly, we observed a reduction in proliferation after DHX30 silencing also in a spheroid assay (**Figure 5D**). The lower growth rate in DHX30 depleted cells cannot be attributed to an arrest in a particular phase of the cell cycle (**Figure 5E**). Instead, it could be associated with a moderate increase in the phosphorylation of eIF2alpha (**Figure 5F**), but not to an obvious ER-stress response, based on the expression of CHOP, DDIT4, TRIB3, and on the XBP1 splicing pattern (**Figure S5A**).

A reduction in proliferation was confirmed also by cell counting upon transient silencing of cDHX30 and, particularly, of both cDHX30 and mDHX30 (**Figure 5G**). The impact on cell proliferation was also examined using U2OS cells stably depleted for DHX30 that showed a significant reduction of proliferation compared to the U2OS\_shNT control (**Figure S5B**). Transient silencing did not impact on the proliferation of U2OS cells, consistent with the results observed on DHX30 target gene expression, while it led to a significant reduction in MCF7 cells (**Figure S5B**).



Furthermore, DHX30 depletion was associated with increased apoptosis after 48 hours of Nutlin treatment, as expected by our previous results [6], but also when cells were treated with the topoisomerase inhibitor doxorubicin and with FCCP, an agent that causes mitochondrial membrane depolarization (**Figure 5H**).

#### *DHX30 signature and cancer outcome*

Our results suggest that DHX30 exerts a constitutive function that improves cellular fitness by balancing energy metabolism and global translation potential. Furthermore, our previous study identified DHX30 as a negative modulator of the translation of specific mRNAs, thus controlling p53-dependent apoptosis [6]. Both these functions suggest that DHX30 could be a modifier of cancer cell properties potentially impacting on clinical variables.

Although total RNA-seq data are not a good proxy for investigating translation controls [16], in this study we showed that DHX30 depletion impacts on steady-state levels of nuclear-encoded mitoribosomal transcripts. MRPL11 and, particularly, MRPS22 can be considered direct DHX30 targets. We next cross-referenced our TE and GSEA data with the RIP results and DHX30 eCLIP data in ENCODE [9] and compiled a list of 14 mitoribosomal protein (MRP) transcripts considered DHX30 direct target candidates (**Figure 6, Figure S6**). Interrogating RNA-seq data of TGCA tumors through the GEPIA web resource [17,18], the expression of DHX30, and of each MRP transcript or of the group of 14 candidate target MRPs appeared to be positively correlated in several cancer types (**Figure 6, Figure S6**), including adrenocortical carcinoma, and hepatocellular carcinomas. No such correlation was instead apparent for other cancer types, including breast or colon adenocarcinomas. We next used this gene signature to stratify patients' clinical outcome. Interestingly, for the cancer types where a positive correlation in the expression of DHX30 and the 14 MRPs was observed, the combined 15-gene signature (*i.e.* including DHX30) showed a prognostic value. In particular, higher expression was associated with reduced Overall Survival or Disease-Free Survival (**Figure 6**). Instead, the comparison of DHX30 expression between tumors and matched controls did not show a consistent trend but confirmed a rather wide variation among samples, and tissue-specific effects including both cases of over-expression and down-regulation (**Figure S7**). Finally, a pan-tissue view revealed a general positive correlation between the expression of ribosome and

mitoribosome protein transcripts in normal samples, that is lost in cancer (**Figure S8**). These preliminary analyses suggest that a functional signature could be developed to predict aggressiveness in cancer types where DHX30 appears to stimulate mitoribosomal proteins expression.

## Discussion

Ribosome biogenesis and translation impose a high metabolic demand on the cell [19,20]. Hence, a coordination between translational control and metabolic output ultimately involving mitochondrial respiratory functions is expected to contribute to cell homeostasis and fitness [21,22]. However, relatively few proteins and pathways have been established to exert a direct role in balancing cytoplasmic translation initiation with mitochondrial metabolism [23,24]. eIF6 represents a significant example, as it has been clearly shown that it negatively controls 80S monosome assembly, a necessary step for translation initiation, while at the same time playing a critical positive role in mitochondrial functions, as revealed by broad changes in the mitochondrial proteome in eIF6 hemizygous mice [25–27].

We propose that DHX30 can also exert an important housekeeping role in coordinating ribosome biogenesis, translation, and mitochondrial respiration. DHX30 depletion in HCT116, stable or transient, leads to a modest but significant increase in ribosome biogenesis as well as in global translation; on the contrary, mito-ribosome transcripts, particularly of the large subunits, exhibit reduced translation efficiency. Furthermore, DHX30 can also exert a more direct role on mitochondria, as the protein can directly localize to the organelle, thanks to an alternative first exon that features a localization signal. The steady state expression of several mitochondrially encoded genes was reduced following the depletion of both DHX30 transcripts and perhaps more effectively, by the reduction of the mitochondrial isoform. A previous study provided clear evidence that DHX30 together with DDX28, FASTKD2, and FASTKD5 can promote the assembly of 55S mito-monosome and translation [4]. Consistent with the relevance of a mitochondrial and translation function, the DHX30 transcript has been shown to be located and locally translated at the ER-Outer Mitochondrial membrane interface, by APEX-seq [14]. In fact, none of the DHX30 closer homologs showed strong evidence of such localized translation, or other evidence of mitochondrial localization.

A previous report also showed evidence for DHX30 interaction with mitochondrial transcripts in human fibroblasts by RIP-seq [4]. Our data instead point to a direct interaction with mitoribosome transcripts and their positive modulation as another means by which DHX30 can indirectly affect mitochondrial translation. We validated by RIP the binding of DHX30 to MRPL11 and MRPS22. Leveraging public data from eCLIP experiments in ENCODE and our polysomal profiling, RNA-seq, and GSEA analysis, we propose that DHX30 could directly interact with fourteen mito-ribosome protein transcripts. An even larger set of ribosomal protein transcripts are nominated as direct DHX30 targets by eCLIP [9] and are showing changes in translation efficiency upon DHX30 depletion in HCT116 cells.

We observed that these two groupings of transcripts markedly differed for their basal translation efficiency, which was low for cytoplasmic ribosomal protein transcripts. Those mRNAs are known to contain particularly structured 5'-UTR and to be strongly regulated at the level of translation initiation by mTOR and MYC-regulated pathways [28–30]. The mechanism by which DHX30 can control ribosomal protein (RP) transcripts remains to be established. In a recent study, we discovered an RNA sequence motif in 3'UTRs, labeled CGPD, that is targeted by DHX30 and can mediate higher translation levels [6]. While we cannot exclude that the CGPD motif could be implicated, only a subset of RP transcripts harbors instances of it. Our *de novo* search for over-represented motifs did not retrieve another prominent candidate *cis*-element. An even lower number of mito-RP transcripts were found to harbor instances of the CGPD-motif. This was expected, as DHX30 is inferred to have an opposite role on RP and mito-RP transcripts based on the direction of changes in their TE observed in HCT116 shDHX30 cells. For the mito-RP gene group, a *de novo* motif over-representation search did not identify a strongly enriched *cis*-element.

The magnitude of fold-change and translation efficiency changes for both ribosomal and mitoribosomal transcripts in response to DHX30 silencing is modest in absolute value. This could be in part due to a limitation of the experimental approach. As reported in our earlier study, a complete knock-out of DHX30 does not seem to be attainable in HCT116 cells. Both our siRNA and even more so the shRNA clones retain partial DHX30 expression. Furthermore, it is important to emphasize that changes in the expression or even polysomal association of ribosomal protein transcripts do not necessarily predict translation rate changes. However, several endpoints consistently suggested that HCT116 shDHX30 cells exhibited higher ribosome number and increased global translation. When treated with an MDM2 inhibitor

inducing strong p53-dependent transcriptional response, those cells were also shown to markedly alter their translome [6]. Our results pointed to a direct role of DHX30 on translation specificity. However, we cannot exclude that the global effect on ribosome biogenesis we propose represents a constitutive, housekeeping function for DHX30. This function would also contribute to the observed changes in translation specificity, under the notion that a change in global translation potential or in the modulation of translation initiation is not expected to impact equally every available transcript in a cell [10,22].

Depletion of DHX30 reduced cell proliferation in various assays. This effect was visible also by transient silencing of just the cytoplasmic transcript, although it was more evident when both cytoplasmic and mitochondrial isoforms were targeted. Although we cannot exclude that the lower proliferation results from a checkpoint activation, as we have seen that in the siRNA experiments the lack of p53 can reduce the proliferation lag (**Figure S9**), cells did not show evidence for overt cell cycle arrest. This is not entirely unexpected, due to the residual levels of DHX30 expression in the cell models we used, as noted above, and also for the possible selective pressure for compensatory effects given the central nature of the processes involved. Transient silencing of DHX30 in HCT116 p53 null cells besides having a reduced impact on proliferation also did not significantly alter the expression of MRPS22, MRPL11 or of mitochondrial transcripts. While this may be suggestive of a functional interaction between DHX30 and p53, results may be affected by the lower efficiency of DHX30 depletion in HCT116 p53<sup>-/-</sup> cells (**Figure S9**).

As several other RBPs, mito-ribosomal proteins have been proposed to have additional, moonlighting functions unrelated to mito-ribosome biogenesis, in particular in the modulation of apoptosis. For example, MRPS29, also known as DAP3, was reported to influence the extrinsic apoptosis pathway [31,32], while MRPL41 was proposed to modulate p53-dependent intrinsic apoptosis [33]. It is, however, unlikely that these potential pro-apoptotic functions can contribute to the proliferation defects seen after DHX30 depletion, given that their expression is not significantly modified. The expression of several mito-ribosome components has been evaluated as potential biomarkers associated with cancer clinical variables [34].

Hence, we reasoned that changes in DHX30 levels to an extent that would not lead to overt stress responses could provide opportunities for increased fitness due to the coordination between mitochondrial function and translation potential, which could be a balancing function between energy supply and demand.

If any, the effects would be expected to reflect tissue-specific differences in metabolism. We explored TGCA data, first evaluating if a positive correlation could be observed in normal tissue and/or primary cancer samples for DHX30 and mito-ribosome gene expression. Cross-referencing eCLIP data, with our polysomal profiling, RNA-seq, RIP results, and GSEA data we compiled a list of fourteen mitoribosomal transcripts as candidate direct DHX30 targets. Interestingly DHX30 and this 14-gene list showed a prognostic significance in cancer types where a positive correlation in their expression was observed. Instead, copy number alterations or mutations in DHX30 were a rare event in cancer (8.6%), were not associated with specific tissue or cancer types, and, although based on a few cases, seemed to be mutually exclusive with mitochondrial genome changes (**Figure S10**).

In conclusion, our study demonstrates the role of DHX30 in the coordination between global cytoplasmic translation and mitochondrial functions. This role contributes to the oncogenic potential of cancer cells, and appears to correlate with tumor aggressiveness and clinical outcome. Furthermore, during stress responses activating p53, DHX30 can reduce the apoptotic commitment of cancer cells by acting on specific pro-apoptotic transcripts, thus providing a potential actionable target for therapeutic purposes [6].

## **Materials and Methods**

### **RNA-seq library preparation and sequencing**

shDHX30 and control cells were either kept untreated or treated with 10 $\mu$ M Nutlin, and processed after 12h. Polysomal profiling and RNA extraction of reconstituted total cytoplasmic fractions was performed as recently described [6]. Sequencing libraries were obtained following the manufacturer instructions of the TruSeq RNA Library preparation kit v2. We used 1.5  $\mu$ g of RNA as input, and assessed the input RNA quality by the Agilent RNA 6000 Nano kit on a Agilent 2100 Bioanalyzer instrument. Four replicates were generated for each condition. The resulting 16 samples were sequenced on a HiSeq 2500 machine producing ~25M raw reads per each sample.

### **RNA-seq data analysis**

Reads were first quality filtered and trimmed with trimmomatic (minimum quality 30, minimum length 36nt) [35]. Then, each Gencode v27 (<http://www.gencodegenes.org/releases/>) transcript was quantified

with Salmon [36]. Eventually, edgeR [37] was used to call Differentially Expressed Genes (DEGs) between conditions at the polysomal and total levels (shDHX30 DMSO vs shNT DMSO), using a 0.05 threshold on the adjusted p-value. GSEA was performed with the fgsea R package [8], including the Hallmark, Canonical Pathways, and GO gene sets. We used 1000 permutations to compute the significance p-value and used a BH adjusted p-value threshold of 0.05. Translational efficiency (TE) was computed on normalized expression data (counts per million reads, CPM) as the ratio of polysomal CPMs over total CPMs for each replicate and transcript in the annotation. Differences in TE (between conditions and groups of genes) and between polysomal and total samples were assessed by the Wilcoxon test. Motifs in ribosomal and mitoribosomal genes 5'- and 3'-UTRs were obtained with DREME [38] using a 1.0E-04 p-value threshold and shuffled input sequences as controls.

### Cell lines and culture conditions

HCT116 and U2OS shNT control or shDHX30 clones were obtained as recently described [6]. Briefly, cells were transduced with lentiviral vectors containing a pLK0.1 plasmid expressing shRNAs. DHX30 targeting sequences are: TRCN0000052028 (GCACACAAATGGACCGAAGAA) TRCN0000052031 (CCGATGGCTGACGTATTTTCAT), TRCN0000052032 (GAGTTGTTTG ACGCAGCCAAA). Stable clones were selected exploiting the puromycin resistance marker. Single clone isolates were obtained and characterized for DHX30 protein depletion. Consistent results were obtained using the three different shRNAs. HCT116 p53<sup>-/-</sup> cells were obtained from the Vogelstein lab (Sur S. et al, 2009). MCF7 cells were purchased from ICLC (IRCCS San Martino Hospital, Genoa, Italy). All cell lines were cultured in RPMI (Gibco, Thermo Fisher Scientific, Waltham, MA, USA) supplemented with 10% Fetal Bovine Serum (Gibco, Thermo Fisher Scientific), 1X L-Glutamine and Pen/Strep (Gibco, Thermo Fisher Scientific) at 37 °C with 5% CO<sub>2</sub> in a humidified atmosphere. U2OS cells were cultured in DMEM pH 7.4 (Gibco, Thermo Fisher Scientific) supplemented with 10% Fetal Bovine Serum (Gibco, Thermo Fisher Scientific), 1X L-Glutamine and Pen/Strep (Gibco, Thermo Fisher Scientific) at 37 °C with 5% CO<sub>2</sub> in a humidified atmosphere. For routine culture of depleted clones and controls, 0.2 µg/mL Puromycin was added to the culture medium to maintain selection of the vectors. Puromycin was removed 24 hours before starting a specific experiment to avoid confounding effects. MCF-7, U2OS and HCT116 parental and p53<sup>-/-</sup> cells were

silenced for cytoplasmic or cytoplasmic + mitochondrial DHX30 variants using 25nM siRNAs (Trifecta, IDT, Coralville, IA, USA) (**Table S2**) transfected with Interferin (Polyplus-transfection, Illkirch, France). All experiments were performed at least 24 hours post-silencing.

## **Western Blot**

Cells were cultured in 6-well tissue culture plates. Cells were collected with trypsin-EDTA after 24 hours, centrifuged and washed with PBS. Samples were then lysed with RIPA buffer and the proteins were quantified by BCA assay (EUROCLONE, Milan, Italy). 30 µg of extracted proteins were loaded on 12% or 15% Tris-glycine Gel and then transferred onto a nitrocellulose membrane using Tris-Glycine buffer. Blocking was performed overnight with 5% not-fat dry milk, 0.1% TWEEN and PBS 1X. Immunodetection was obtained using primary and secondary antibodies reported in **Table S3**. Membranes were analyzed by ECL and detected with ChemiDoc™ XRS+ (Bio-Rad, Hercules, CA, USA) using ImageLab software (Bio-Rad).

## **Polysome profiling**

Polyribosome analysis was performed as described in [39–41]. Briefly, HCT116 cells were grown on 15 cm Petri dishes with standard media and serum. When the cells reached 80% of confluence, cycloheximide (0.01 mg/ml, Sigma Aldrich) was added and kept in incubation for 10 min. Then cells were washed two times with cold PBS containing cycloheximide (0.01 mg/ml) and lysed with the following lysis buffer: 20 mM Tris-HCl (pH 7.5), 100 mM KCl, 5 mM MgCl<sub>2</sub>, 0.5% Nonidet P-40, 100 U/ml RNase inhibitors. Mitochondria and nuclei-free lysates were loaded onto 15–50% (w/v) density sucrose gradients in salt solution (100 mM NaCl, 5 mM MgCl<sub>2</sub>, 20 mM Tris-HCl pH 7.5), and ultracentrifuged at 180 000 × g for 100 min at 4°C. The sedimentation profiles were monitored by absorbance at 254 nm using a Teledyne ISCO UA-6 fractionator coupled to UV detector, collecting thirteen 1 ml fractions. RNA from pooled polysomal fraction was extracted and processed as described in [6]. For Western blot analysis, 100 µl of 100% TCA and 1 ml of ice-cold acetone were added to 1 ml of each fraction. Then samples were put at –80 °C overnight to induce protein precipitation. Subsequently samples were centrifuged at 16,000 × g for 10



min at 4 °C and washed three times with 1 mL of ice-cold acetone. Finally, the pellets were solubilized directly in Laemmli buffer pH 8.

### **Ribosome isolation**

Ribosome isolation was performed following a protocol previously described [42]. Briefly,  $8 \times 10^6$  cells were seeded in a T150 flask, 48 hours before the procedure. At 80% of confluence, cells were detached and counted.  $1 \times 10^7$  cells were pelleted by 500 x g centrifugation for 5 minutes at 4°C and washed once with cold PBS. Supernatant was discarded and the pellet was resuspended gently with 300µL of cold buffer A (sucrose 250mM, KCl 250mM, MgCl<sub>2</sub> 5mM, and Tris-Cl 50 mM pH 7.4), added in three sequential steps, pipetting after every addition. To perform cell lysis, an appropriate volume of NP-40 was added to the homogenized cellular solution, in order to obtain a 0.7% (v/v) final concentration of the detergent, and cells were incubated on ice for 15 minutes, homogenizing the suspension by gentle pipetting every 5 minutes. Then the cell lysate was centrifuged at 750 x g for 10 minutes at 4°C to pellet nuclei; the recovered cytoplasmic fraction (supernatant) was centrifuged again at 12.500 x g for 10 minutes at 4°C to obtain a mitochondria pellet. Supernatant containing ribosomes was collected and its volume was accurately measured using a graduated pipet. KCl 4M solution was then slowly added in order to reach a final concentration of 0.5M. Meanwhile, 1mL of the sucrose cushion solution (sucrose 1M, KCl 0.5M, MgCl<sub>2</sub> 5mM and Tris-Cl 50mM pH 7.4) was added into 3-mL polycarbonate tube for an ultracentrifuge TL100.3 rotor (Beckman Coulter, Brea, CA, USA). The KCl-adjusted ribosome-containing solution was carefully added above the sucrose cushion and tubes were balanced by weight using buffer B (sucrose 250mM, KCl 0.5M, MgCl<sub>2</sub> 5mM and Tris-Cl 50mM pH 7.4). Then, they were ultracentrifuged at 250.000 x g for 2 hours at 4°C. At the end of the centrifugation, the supernatant was discarded and a very compact and dense translucent pellet containing ribosomes was quickly rinsed twice by carefully adding 200µL of cold water. Then, pellet was resuspended in 300µL of buffer C (KCl 25mM, MgCl<sub>2</sub> 5mM and Tris-Cl 50mM pH 7.4), adding the solution in three sequential steps and gently homogenized by pipetting after every 100µL addition. Finally, to estimate the amounts of ribosomes, absorbance at 260nm of the suspensions was measured by a nanodrop spectrophotometer (ThermoFisher).

## 457 **Global Translation**

458 Global translation assay was performed using Click-iT<sup>®</sup> AHA Alexa Fluor<sup>®</sup> 488 Protein Synthesis HCS  
 459 Assay (Thermo Fisher Scientific). Briefly, HCT116 shNT and shDHX30 cells were cultured in 96-well  
 460 tissue culture plate and treated with 100mM 5-Fluorouracil (Sigma Aldrich) as positive control. After 24  
 461 hours of treatment, the culture medium was removed and 50μM L-azidohomoalanine prepared in pre-  
 462 warmed L-methionine-free medium (Lonza) was added and cells were incubated for 1 hour. Cell fixation  
 463 was performed using 3.7% formaldehyde (Sigma Aldrich) incubating the plate at room temperature for 15  
 464 minutes. After two washing with 3% BSA in PBS 1X cells were permeabilized with 0.5% Triton<sup>®</sup> X-100  
 465 (Sigma Aldrich) and incubated for 15 minutes at room temperature. Cells were washed twice with 3% BSA  
 466 in PBS 1X and Click-iT<sup>®</sup> reaction cocktail was added incubating for 30 minutes at room temperature,  
 467 protected from light. After the incubation reaction cocktail was removed, cells were washed twice with 3%  
 468 BSA in PBS 1X and stained with 5μg/mL Hoechst (Sigma Aldrich). Samples' images were acquired and  
 469 analysed by high content fluorescence microscope Operetta<sup>®</sup> (PerkinElmer, Waltham, MA, USA) using the  
 470 following filter set: Alexa Fluor<sup>®</sup> 488: Ex495/Em519 nm; Hoechst: Ex350/Em461 nm.

471

## 472 **Fluorescent In Situ Hybridization (FISH) on rRNA precursors**

473 Cells were cultured on a coverslip place onto a 48-well plate and after 48 hours they were washed with PBS  
 474 and fixed with 4% Paraformaldehyde (PFA) (Sigma Aldrich) for 30 minutes at RT. Then, cells were washed  
 475 twice with PBS 1X and incubated in 70% ethanol overnight at 4°C. The day after, cells were rehydrated  
 476 with 10% formamide in 2X SSC (Sigma Aldrich), twice for 5 minutes at RT. Meanwhile, buffer A [5μL  
 477 formamide, 2.5μL SSC 2X, 2.5μL tRNA (10 ng/μL), water up to 20.25μL and then 2.5μL of each probe  
 478 (10 ng/μL)] was incubated for 5 minutes at 90°C and then mixed quickly together with buffer B [25μL  
 479 Dextran sulfate 20% in SSC 4X, 1.25μL Bovine Serum Albumin (BSA) (10ng/μL) and 2.5μL  
 480 ribonucleoside vanadyl complex (RVC) (200mM)]. Then, 50μL A+B probe solution was dropped onto the  
 481 coverslip and it was incubated in a humidified chamber for 3 hours at 37°C. When the incubation was  
 482 finished, the coverslip was washed twice with 10% formamide in SSC 2X for 30 minutes at RT and once  
 483 with PBS 1X for 5 minutes. Cells were stained with a solution of 0.5μg/mL DAPI (Sigma Aldrich) in PBS  
 484 1X for 5 minutes, washed three times with PBS 1X and the coverslip was finally placed with mounting

medium on glass slide. Finally, images were acquired using Zeiss Observer z1 fluorescent microscope (Carl Zeiss, Oberkochen, Germany) with ZEN 2 blue edition software ver. 2.3 (Carl Zeiss). Images' fluorescence intensity was measured using Cell Profiler software ver. 3.1.9 (Broad Institute, Cambridge, MA, USA).

## **rRNA biogenesis**

rRNA biogenesis was performed following the protocol described by [43,44]. Briefly, cells were cultured in 96-well tissue culture plates and after 24 hours were treated with Actinomycin D 100nM (Sigma Aldrich) as positive control. After 24 hours of treatment, 1mM 5-Ethynyluridine (Sigma Aldrich) was added to the culture medium and the plate was incubated for 2 hours. This short incubation with 5-EU allows a higher rate of incorporation in rRNAs than mRNAs, reducing the background signal. Then, cells were fixed using a working solution 1 (WR1) composed by 125mM Pipes pH 6.8 (Sigma Aldrich), 10mM EGTA (Sigma Aldrich), 1mM MgCl<sub>2</sub> (Merck Millipore, Burlington, MA, USA), 0.2% Triton® X-100 (Sigma Aldrich) and 3.7% formaldehyde (Sigma Aldrich). Cells were washed twice with TBS 1X and stained for 30 minutes at room temperature using a working solution 2 (WR2) composed by 100mM Tris-HCl pH 8.5 (Sigma Aldrich), 1mM CuSO<sub>4</sub> (Merck Millipore), 10µM fluorescent azide (Sigma Aldrich) and 100mM ascorbic acid (Merck Millipore). After four washes with TBS containing 0.5% Triton X-100, cells were stained with 0.5µg/mL Hoechst (Sigma Aldrich) and samples' images were acquired and analysed by high content fluorescent microscope Operetta® (PerkinElmer) using the following filter set: Alexa Fluor® 488: Ex495/Em519 nm; Hoechst: Ex350/Em461 nm and setting a threshold on Alexa Fluor® 488 at 500 fluorescent units to plot the percentage of cells with high nucleolar signal intensity.

## **Colony formation**

1.0x10<sup>3</sup> HCT116 shNT and shDHX30 cells per well were seeded in a 6-well plate and incubated. Culture medium was changed every three days. Colonies were ex fixed with 3.7% formaldehyde and stained with a solution containing 30% Methylene blue (Sigma Aldrich) in water, then washed five times for 5 minutes. Images were acquired and analysed using ImageJ software 1.8.0 (National Institute of Health, Bethesda, MD, USA).

513

## 514 **Cell Count in High-Content analysis and Real Time Cell Index Analysis**

515 To analyze cell proliferation by cell count,  $1.0 \times 10^3$  cells per well were seeded in 96-well plates and  
 516 incubated. Images were acquired by high content fluorescent microscope Operetta® (PerkinElmer) in digital  
 517 phase contrast for three days. To analyse cell proliferation by Real Time Cell Analyser xCELLigence®  
 518 (RTCA) (Roche, Basel, Switzerland) the background was set adding the only cell culture medium in each  
 519 well of E-plate and incubating 30 minutes. After incubation, background was read. Then  $1.0 \times 10^3$  cells per  
 520 well were seeded and incubated for 30 minutes and then the E-plate was inserted in the RTCA and  
 521 impedance-based cell proliferation was estimated by RTCA readings every 15 minutes in the course of  
 522 three days.

523

## 524 **Spheroid assay formation**

525  $3.0 \times 10^3$  HCT116 shNT and shDHX30 cells per well were seeded in U-bottom ultra-low attachment 96-well  
 526 plate (Corning Incorporated, Corning, NY, USA), centrifuged at 3000 rpm for 5 minutes and incubated.  
 527 Starting after three days of incubation, images were acquired every 24 hours for eight additional days by  
 528 microscope (Leica, Wetzlar, Germany). Spheroids' area was measured by ImageJ software.

529

## 530 **Immunofluorescence**

531  $3.0 \times 10^5$  cells per well were seeded on glass coverslip inserted in 6-well plates and incubated overnight. The  
 532 days after, cells were fixed in 4% Paraformaldehyde (PFA) for 15 min. Then the PFA solution was removed  
 533 and cells were rinsed twice with PBS 1X. After washing, cells were incubated for 1 hour with blocking  
 534 solution (PBS 1X, 5% BSA and 0.5% Triton X-100). Next, cells were incubated overnight at 4°C with  
 535 primary antibodies (Table 2.4) diluted in blocking solution. The following day, after three washes with PBS  
 536 1X, the anti-mouse and anti-rabbit secondary antibodies conjugated with AlexaFluor 488 or AlexaFluor  
 537 594 (Invitrogen, Carlsbad, CA, USA) (diluted 1:1000) were added to the samples and incubated for 1 hour  
 538 at RT under agitation. Cells were washed with PBS 1X three times and cell nuclei were stained with  
 539 0.5µg/mL Hoechst (Sigma Aldrich) (diluted 1:5000). Finally, coverslips were mounted on glass slides and

images were acquired using Zeiss Observer Z1 fluorescent microscope and Zen 2012® software (Carl Zeiss Jena, Germany). The list of primary antibodies used are reported in **Table S3**.

### **Compensatory Glycolytic Test**

3.0x10<sup>3</sup> cells per well were seeded in Xfp cell culture microplate (Agilent Technologies, Santa Clara, CA, USA) and incubated overnight while XF calibrant solution was added in each well of extracellular flux cartridge and incubated overnight without CO<sub>2</sub>. The day after, culture media was removed from cells, replaced with assay medium and microplate was incubated 45 minutes at 37°C without CO<sub>2</sub>. Extracellular flux cartridge was prepared adding 0.5µM rotenone/antimycin A in port A and 50mM 2-Deoxyglucose in port B diluted in Xfp assay medium and the cartridge was calibrated by Seahorse XFp analyser setting Glycolysis Test program. When the calibration was finished, cell microplate was inserted in a Seahorse XFp analyser starting the analysis.

### **RNA extraction and qRT-PCR**

3.0x10<sup>5</sup> cells per well were seeded in a 6-well plate and incubated overnight. The day after, cells were starved and lysed with β-mercaptoethanol and RNA was extracted using Illustra RNAspin Mini RNA Isolation kit (GE-Healthcare, Chicago, IL, USA) following the kit protocol. Then, RNA was retro-transcribed using the RevertAid RT Kit (Thermo Fisher Scientific). Finally, RT-qPCR was performed using 25ng and 2x qPCR SyGreen (PCR Biosystem, London, England) in Cfx96™ Real-Time System or Cfx384™ Real-Time System Thermocyclers (Bio-Rad). The sequence of all primers used is reported in **Table S2**.

### **Digital droplet PCR**

Digital droplet PCR was performed based on the protocol developed by Bio-Rad. Briefly, 1x10<sup>5</sup> cells were seeded in 6-well plate and grown for 1 day. Next cells were detached, counted and solubilized in DireCtQuant 100ST solubilization reagent (DireCtQuant, Lleida, Spain) at the concentration of 1000 cells/µL, incubating for 3 minutes at 90°C with shaking at 750 rpm and then centrifuged for 1 minute at 10000 g. Lysates were obtained by incubation for 3 minutes at 90°C under shaking at 750 rpm and then

centrifuged for 1 minute at 10000 g. Lysate was diluted 1:4 in solubilization reagent and for every target to analyze, PCR mix was prepared comprising 2μL of diluted sample, forward and reverse primers at 10μM final concentration in a final volume of 95μL. PCR mix without lysate was used as negative control. Then, 10.5μL of each PCR reaction was mixed with 11μL of 2xQX200 ddPCR EvaGreen SuperMix (Bio-Rad) and 0.5μL of HindIII restriction enzyme (NEB, Ipswich, MA, USA). Sample DNA was digested at 37°C for 15 minutes and loaded in ddPCR DG8™ Cartridge with QX200™ droplet generation oil (Bio-Rad). Droplets were made using QX200™ droplet generator (Bio-Rad) and then loaded in a 96-well PCR plate. Sample DNA was amplified and finally, droplets with amplified DNA were analyzed using the QX200™ droplet reader and QuantaSoft 1.7.4 (Bio-Rad).

### **RNA Immunoprecipitation**

HCT116 cells were cultured in standard medium in P150 plates till they reached ~80% confluence. ~10<sup>7</sup> cells were lysed in 1mL of Lysis buffer (100mM KCl, 5mM MgCl<sub>2</sub>, 10mM HEPES pH 7, 0.5% NP-40, 1mM DTT, 1U/ul RNase Inhibitors, 1X Protease Inhibitor Cocktail) using a scraper. Lysates were transferred in a falcon tube, placed for at least two hours at -80°C, and centrifuged at 10000 rpm for 30 minutes. Supernatants were collected in a new tube. Dynabeads ProteinA or ProteinG (depending on the antibody species, Thermo Fisher scientific) were prepared by washing them twice with NT2 Buffer (50mM Tris-HCl pH7.4, 150mM NaCl, 1mM MgCl<sub>2</sub>; 0.05% NP40) and resuspended in NT2 buffer. Beads were distributed in different tubes, supplemented with twice their initial volume of NT2 Buffer. The DHX30 specific antibody (5 μg -A302-218A, Bethyl) or IgGs were added to the beads and incubated for 2 hours on a rotating wheel at 4°C. Lysates were pre-cleared by adding a mix containing ProteinA and ProteinG Dynabeads in equal amounts and incubating for 1 hour at 4°C on a wheel. After placing the tubes on a magnet, supernatants were collected and 1% of their volume was used as input to be directly extracted with TRIzol. The remaining supernatant was added to the antibody-coated beads and incubated overnight on a wheel at 4°C. The day after, beads were washed with 1ml NT2 buffer for 10 minutes on a wheel at 4°C. Three additional washes were performed again with 1ml NT2 Buffer supplemented with 0.1% Urea + 50mM NaCl (10 minutes each at 4°C on a wheel). Beads were washed one more time in 500μl of NT2 buffer, 50μl were collected for WB analysis and the remaining supernatant was discarded. RNA was

596 extracted by adding TRIzol to the beads, according to the manufacturer's protocol. The RNA pellets were  
597 resuspended in 15µl DEPC water and cDNAs were synthesized using the RevertAid First Strand cDNA  
598 Synthesis Kit (Thermo Fisher Scientific).

599

## 600 **Cytoplasm-Mitochondria fractionation**

601 For cytoplasm-mitochondria fractionation,  $2 \times 10^6$  cells were seeded in a P150 Petri dish and incubated for  
602 2 day. Then, they were detached using trypsin and re-suspended in 750µL of Mitochondrial Isolation Buffer  
603 (MIB) (0.32M Sucrose, 1mM EGTA pH 8.0, 20mM Tris-HCl pH 7.2) with 0.1% fatty acid-free BSA. Cells  
604 were homogenized in a Potter-Elvehjem homogenizer (DWK Life Sciences, Mainz, Germany) applying  
605 more than 60 strokes. Homogenate (A) was centrifuged for 5 minutes at 1000g at 4°C and supernatant was  
606 collected. Cell debris were resuspended in 750µL of MIB + BSA and re-homogenized with more than 20  
607 strokes. New homogenate (B) was centrifuged for 5 minutes at 1000g at 4°C and the supernatant was  
608 collected and pooled with supernatant A. Two mixed supernatants (A+B) were centrifuged at 12000g for  
609 10 minutes at 4°C to pellet the mitochondria. Supernatant was discarded and mitochondria were washed  
610 twice with 1mL of MIB + BSA and once with 1mL of MIB, centrifuging the mitochondrial pellet every  
611 time at 12000g for 10 minutes at 4°C. Finally, supernatant was discarded and mitochondria were lysed in  
612 RIPA buffer and mitochondrial proteins were quantified by BCA assay.

613

## 614 **Apoptosis assay**

615 Apoptosis analysis was based on FITC Annexin-V Apoptosis Detection Kit protocol (BD Biosciences, San  
616 Jose, CA, USA). Briefly,  $3 \times 10^5$  cells per well were seeded in a 6-well plate, incubated for one day and then  
617 treated with drugs under investigation for 48 hours. 0.1% DMSO was used as negative control. Cells were  
618 detached using trypsin and washed twice with PBS 1X. Then,  $1.5 \times 10^5$  cells were resuspended in 100µL of  
619 Binding Buffer 1X, stained with FITC-Annexin V and PI and incubated for 15 minutes at room temperature  
620 in the dark. Finally, samples were analyzed by FACSCanto™ flow cytometer and BD Diva Software 6.1.3.  
621 Unstained, PI-only and FITC-only stained samples were used to set the cytometer's parameters.

622

## 623 **Cell cycle analysis**



HCT shNT or shDHX30 were seeded in 6-well plates at a concentration of  $3 \times 10^5$  cell/well. 48 hours after seeding, cells were trypsinized, washed with 1X PBS and counted for subsequent staining according to BD Cycletest™ Plus DNA Kit protocol. Briefly,  $5 \times 10^5$  cells were centrifuged, supernatant was removed and 250 µl of Solution A were added. Cells were resuspended and incubated for 10 minutes before adding 200 µl of Solution B. After 10 minutes of incubation, 200 µl of ice-cold Solution C were added to the samples and cells were incubated for 10 minutes at 4°C in the dark before analysis with FACS CantoA (BD). The percentage of cells in each stage of the cell cycle (G1, S or G2) was computed using the ModFIT LT 4.0 software (Verity Software House).

### **Exploration of TCGA data using the GEPIA web resource**

The GEPIA API [17,18] was used to extract correlations between DHX30 and mitochondrial genes (either as individual genes or for the 14-genes signature) in all available TCGA tumor datasets (correlation mode). The same analysis was performed to correlate cytoplasmic ribosome and mitochondrial ribosome genes expression, on TCGA tumor samples, matched TCGA normal samples, and GTEx healthy tissues RNA-seq data. Survival analysis was performed with the same tool and in the same datasets, using the survival mode. Only results within the p-value threshold of 0.05 were considered, with the others being set to R=0 and HR=1 in the heatmap for visualization purposes.

### **Statistical analysis**

Data are presented as mean  $\pm$  SD of three independent biological experiments, unless stated otherwise. GraphPad Prism 5 or 9 software (GraphPad software, La Jolla, CA, USA) were used and either a two-way anova with Tukey's multiple comparison test or a two-tailed Student's t-test was performed, unless specified otherwise.

### **Data availability**

The RNA-seq datasets are available in GEO with ID GSE95024 and GSE154065.

## 650 Acknowledgements

651 We thank Pamela Gatto, Viktoryia Sirarovich and Michael Pancher of the HTS CIBIO core facility for  
 652 assistance with droplet digital PCR experiments, high-content as well as impedance-based proliferation  
 653 assays. We thank Nicoletta di Bernardo for technical assistance for the apoptosis assays. This work was  
 654 supported by the Italian Association for Cancer Research (Fondazione AIRC, IG grant #18985 to AI). JJD  
 655 laboratory is supported by grants by the Institut National du Cancer (INCa, grant PRT-K program n°2018-  
 656 024 EMT-CoNCEPT) and Agence Nationale de la Recherche (ANR, grant RiboCard ANR-18-CE11-0020,  
 657 and grant ActiMeth ANR-19-CE12-0004).

## 659 Competing Interests

660 The Authors declare no competing interest.

## 662 Authors contributions

663 B.B. performed most experiments and wrote the first draft of the paper. A.R., D.R., S.G., A.P., F.B., and,  
 664 A.G. helped in some experimental procedures. F.C. and J-J.D. helped to design some experiments. E.D.  
 665 performed all data analysis. E.D. and A.I. designed the study. A.I. co-wrote the first draft of the manuscript.

## 667 References

- 669 1. Zheng HJ, Tsukahara M, Liu E, Ye L, Xiong H, Noguchi S, et al. The novel helicase helG (DHX30)  
 670 is expressed during gastrulation in mice and has a structure similar to a human DEXH box helicase.  
 671 Stem Cells Dev. 2015;24: 372–383. doi:10.1089/scd.2014.0077
- 672 2. Ye P, Liu S, Zhu Y, Chen G, Gao G. DEXH-Box protein DHX30 is required for optimal function  
 673 of the zinc-finger antiviral protein. Protein Cell. 2010; doi:10.1007/s13238-010-0117-8
- 674 3. Lessel D, Schob C, Kury S, Reijnders MRF, Harel T, Eldomery MK, et al. De Novo Missense  
 675 Mutations in DHX30 Impair Global Translation and Cause a Neurodevelopmental Disorder. Am J  
 676 Hum Genet. 2017;101: 716–724. doi:10.1016/j.ajhg.2017.09.014
- 677 4. Antonicka H, Shoubbridge EA. Mitochondrial RNA Granules Are Centers for Posttranscriptional  
 678 RNA Processing and Ribosome Biogenesis. Cell Rep. 2015;10: 920–932.  
 679 doi:10.1016/j.celrep.2015.01.030
- 680 5. Andrysyk Z, Galbraith MD, Guarnieri AL, Zaccara S, Sullivan KD, Pandey A, et al. Identification  
 681 of a core TP53 transcriptional program with highly distributed tumor suppressive activity. Genome  
 682 Res. 2017;27. doi:10.1101/gr.220533.117
- 683 6. Rizzotto D, Zaccara S, Rossi A, Galbraith MD., Andrysyk Z, Pandey A, et al. Nutlin-Induced  
 684 Apoptosis is Specified by a Translation Program Regulated by PCBP2 and DHX30. Cell Rep.  
 685 2020;30: 1–15.
- 686 7. Tovar C, Rosinski J, Filipovic Z, Higgins B, Kolinsky K, Hilton H, et al. Small-molecule MDM2  
 687 antagonists reveal aberrant p53 signaling in cancer: implications for therapy. Proc Natl Acad Sci U  
 688 S A. 2006;103: 1888–1893. doi:10.1073/pnas.0507493103
- 689 8. Sergushichev AA. An algorithm for fast preranked gene set enrichment analysis using cumulative

- statistic calculation. bioRxiv. 2016; doi:10.1101/060012
9. Van Nostrand EL, Pratt GA, Shishkin AA, Gelboin-Burkhart C, Fang MY, Sundararaman B, et al. Robust transcriptome-wide discovery of RNA-binding protein binding sites with enhanced CLIP (eCLIP). *Nat Methods*. 2016;13: 508–514. doi:10.1038/nmeth.3810
10. Mills EW, Green R. Ribosomopathies: There's strength in numbers. *Science*. 2017. p. eaan2755. doi:10.1126/science.aan2755
11. Wang Y, Bogenhagen DF. Human mitochondrial DNA nucleoids are linked to protein folding machinery and metabolic enzymes at the mitochondrial inner membrane. *J Biol Chem*. 2006;281: 25791–802. doi:10.1074/jbc.M604501200
12. Smith AC, Robinson AJ. MitoMiner v3.1, an update on the mitochondrial proteomics database. *Nucleic Acids Res. Oxford University Press*; 2016;44: D1258–D1261. doi:10.1093/nar/gkv1001
13. Armenteros JJA, Salvatore M, Emanuelsson O, Winther O, Von Heijne G, Elofsson A, et al. Detecting sequence signals in targeting peptides using deep learning. *Life Sci Alliance. Rockefeller University Press*; 2019;2. doi:10.26508/lsa.201900429
14. Fazal FM, Han S, Parker KR, Kaewsapsak P, Xu J, Boettiger AN, et al. Atlas of Subcellular RNA Localization Revealed by APEX-Seq. *Cell*. 2019; doi:10.1016/j.cell.2019.05.027
15. Heiden MG, Cantley LC, Thompson CB. Understanding the warburg effect: The metabolic requirements of cell proliferation. *Science*. 5930: 1029–1033; 2009. p. 324. doi:10.1126/science.1160809
16. Schwanhüsner B, Busse D, Li N, Dittmar G, Schuchhardt J, Wolf J, et al. Global quantification of mammalian gene expression control. *Nature*. 2011;473: 337–342. doi:10.1038/nature10098
17. Tang Z, Li C, Kang B, Gao G, Li C, Zhang Z. GEPIA: A web server for cancer and normal gene expression profiling and interactive analyses. *Nucleic Acids Res*. 2017;45: W98–W102. doi:10.1093/nar/gkx247
18. Tang Z, Kang B, Li C, Chen T, Zhang Z. GEPIA2: an enhanced web server for large-scale expression profiling and interactive analysis. *Nucleic Acids Res*. 2019;47: W556–W560. doi:10.1093/nar/gkz430
19. Wieser W, Krumschnabel G. Hierarchies of ATP-consuming processes: Direct compared with indirect measurements, and comparative aspects. *Biochem J*. 2001; 389–95. doi:10.1042/0264-6021:3550389
20. Buttgerit F, Brand MD. A hierarchy of ATP-consuming processes in mammalian cells. *Biochem J*. 1995; 163–7. doi:10.1042/bj3120163
21. Couvillion MT, Soto IC, Shipkovenska G, Churchman LS. Synchronized mitochondrial and cytosolic translation programs. *Nature*. 2016;533: 499–503. doi:10.1038/nature18015
22. Calamita P, Gatti G, Miluzio A, Scagliola A, Biffo S. Translating the game: Ribosomes as active players. *Front Genet*. 2018;15: 533. doi:10.3389/fgene.2018.00533
23. Pla-Martín D, Schatton D, Wiederstein JL, Marx M, Khiati S, Krüger M, et al. CLUH granules coordinate translation of mitochondrial proteins with mTORC1 signaling and mitophagy. *EMBO J*. 2020;39: e102731. doi:10.15252/embj.2019102731
24. Morita M, Prudent J, Basu K, Goyon V, Katsumura S, Hulea L, et al. mTOR Controls Mitochondrial Dynamics and Cell Survival via MTFP1. *Mol Cell*. 2017;67: 922–935. doi:10.1016/j.molcel.2017.08.013
25. Clarke K, Ricciardi S, Pearson T, Bharudin I, Davidsen PK, Bonomo M, et al. The Role of Eif6 in Skeletal Muscle Homeostasis Revealed by Endurance Training Co-expression Networks. *Cell Rep*. 2017; doi:10.1016/j.celrep.2017.10.040
26. Biffo S, Manfrini N, Ricciardi S. Crosstalks between translation and metabolism in cancer. *Current Opinion in Genetics and Development*. 2018. doi:10.1016/j.gde.2017.10.011
27. Ricciardi S, Manfrini N, Alfieri R, Calamita P, Crosti MC, Gallo S, et al. The Translational Machinery of Human CD4 + T Cells Is Poised for Activation and Controls the Switch from Quiescence to Metabolic Remodeling. *Cell Metab. Cell Press*; 2018;28: 895–906.e5. doi:10.1016/j.cmet.2018.08.009
28. Pourdehnad M, Truitt ML, Siddiqi IN, Ducker GS, Shokat KM, Ruggero D. Myc and mTOR converge on a common node in protein synthesis control that confers synthetic lethality in Myc-driven cancers. *Proc Natl Acad Sci U S A*. 2013;110: 11988–93. doi:10.1073/pnas.1310230110
29. Hong S, Freeberg MA, Han T, Kamath A, Yao Y, Fukuda T, et al. LARP1 functions as a molecular switch for mTORC1-mediated translation of an essential class of mRNAs. *Elife*. 2017;6: e25237.

doi:10.7554/eLife.25237

30. Amaldi F, Pierandrei-Amaldi P. TOP genes: a translationally controlled class of genes including those coding for ribosomal proteins. *Progress in molecular and subcellular biology*. 1997. pp. 1–17. doi:10.1007/978-3-642-60471-3\_1
31. Gressner O, Schilling T, Lorenz K, Schulze Schleithoff E, Koch A, Schulze-Bergkamen H, et al. TAp63alpha induces apoptosis by activating signaling via death receptors and mitochondria. *Embo J*. 2005;24: 2458–2471. doi:10.1038/sj.emboj.7600708
32. Kissil JL, Deiss LP, Bayewitch M, Raveh T, Khaspekov G, Kimchi A. Isolation of DAP3, a novel mediator of interferon- $\gamma$ -induced cell death. *J Biol Chem*. 1995;46: 27932–6. doi:10.1074/jbc.270.46.27932
33. Yoo YA, Kim MJ, Park JK, Chung YM, Lee JH, Chi S-G, et al. Mitochondrial Ribosomal Protein L41 Suppresses Cell Growth in Association with p53 and p27Kip1. *Mol Cell Biol*. 2005;15: 6603–13. doi:10.1128/mcb.25.15.6603-6616.2005
34. Kim HJ, Maiti P, Barrientos A. Mitochondrial ribosomes in cancer. *Seminars in Cancer Biology*. 2017. pp. 67–81. doi:10.1016/j.semcancer.2017.04.004
35. Bolger AM, Lohse M, Usadel B. Trimmomatic: a flexible trimmer for Illumina sequence data. *Bioinformatics*. 2014;30: 2114–2120. doi:10.1093/bioinformatics/btu170
36. Patro R, Duggal G, Love MI, Irizarry RA, Kingsfor C. Salmon provides accurate, fast, and bias-aware transcript expression estimates using dual-phase inference. *bioRxiv Prepr*. 2016;
37. Robinson MD, McCarthy DJ, Smyth GK. edgeR: a Bioconductor package for differential expression analysis of digital gene expression data. *Bioinformatics*. 2010;26: 139–140. doi:10.1093/bioinformatics/btp616
38. Bailey TL. DREME: Motif discovery in transcription factor ChIP-seq data. *Bioinformatics*. 2011;15: 1653–1659. doi:10.1093/bioinformatics/btr261
39. Provenzani A, Fronza R, Loreni F, Pascale A, Amadio M, Quattrone A. Global alterations in mRNA polysomal recruitment in a cell model of colorectal cancer progression to metastasis. *Carcinogenesis*. 2006;27: 1323–1333.
40. Viero G, Lunelli L, Passerini A, Bianchini P, Gilbert RJ, Bernabò P, et al. Three distinct ribosome assemblies modulated by translation are the building blocks of polysomes. *J Cell Biol*. 2015;208: 581–96. doi:10.1083/jcb.201406040
41. Panda A, Martindale J, Gorospe M. Polysome Fractionation to Analyze mRNA Distribution Profiles. *BIO-PROTOCOL*. 2017;7: e2126. doi:10.21769/bioprotoc.2126
42. Belin S, Hacot S, Daudignon L, Therizols G, Pourpe S, Mertani HC, et al. Purification of ribosomes from human cell lines. *Current Protocols in Cell Biology*. 2010. p. unit 3.40. doi:10.1002/0471143030.cb0340s49
43. Cornella N, Tebaldi T, Gasperini L, Singh J, Padgett RA, Rossi A, et al. The hnRNP RALY regulates transcription and cell proliferation by modulating the expression of specific factors including the proliferation marker E2F1. *J Biol Chem*. 2017;292: 19674–19692. doi:10.1074/jbc.M117.795591
44. Rossi A, Moro A, Tebaldi T, Cornella N, Gasperini L, Lunelli L, et al. Identification and dynamic changes of RNAs isolated from RALY-containing ribonucleoprotein complexes. *Nucleic Acids Res*. 2017;45: 6775–6792. doi:10.1093/nar/gkx235

**Table S1: RNA-seq Fold Change data and results of GSEA analysis for the comparison between HCT\_shDHX30 and HCT\_shNT.**

A), B) ID, gene symbol, fold change, F value, P value and FDR based on RNA-seq data of (A) polysomal RNA, (B) total RNA. GSEA data for polysomal (C) or total (D) RNA-seq data.

**Table S2: siRNAs, FISH probe, and primers.**

Contains information on all primers used in qRT-PCR experiments.

**Table S3: List of primary and secondary antibodies**

**Figure legends**

**Figure 1. DHX30 reduces ribosome biogenesis and translation in HCT116 colorectal cancer cells.**

**A)** Most significant terms by Gene Set Enrichment Analysis of the polysome-bound DEGs (HCT\_shDHX30 vs HCT sh\_NT). Bars plot the Normalized Enrichment Score, (NES). Numbers indicate the number of genes in the leading edge. See Table S1 for full results. **B)** Box plot of Translation efficiency for the indicated transcript groups. The RNA-seq CPM in polysomal over total RNA was measured. Results obtained in HCT116\_shDHX30 cells are compared to the shNT control clone ; \* $p < 0.05$ , \*\*\* $p < 0.001$ . **C)** Amounts of ribosomes produced in HCT116\_shDHX30 and HCT\_shNT. After ribosomes isolation, protein absorbance was measured at  $\lambda$  260nm. Data are normalized on shNT and are mean  $\pm$  SD (n=3); \* $p < 0.05$ . **D)** Amount of ribosomal RNA estimated based on the fluorescence intensity of 5-ethynyl uridine (5-EU) incorporated in nascent rRNAs present in the nucleoli. HCT116\_shDHX30 cells are compared to the shNT control clone in untreated condition while Actinomycin-D treatment was used as a control. Data are mean  $\pm$  SD (n=6); \*\*\* $p < 0.001$ . **E)** (Left) Representative images of one of three independent experiments of Fluorescent In Situ Hybridization (FISH) for rRNA precursor 18S (red). Immunofluorescence of tubulin (green) and staining with DAPI (blue) were used to visualize cells. (Right) Box plot of 18S rRNA intensity quantification comparing HCT116\_shDHX30 with HCT\_shNT analyzed with Cell Profiler software. Data are expressed as mean per well  $\pm$  SD of three biological replicates in which 10 nuclei were quantified for each replicate; \* $p < 0.05$ . **F)** Analysis of global translation based on the fluorescence intensity of L-azidohomoalanine (AHA) incorporated in nascent proteins present in the cytoplasm. HCT116\_shDHX30 cells are compared to the shNT control clone in untreated condition while 5-Fluorouracil treatment was used as positive control. Data are mean  $\pm$  SD (n=6 to 9); \*\*\* $p < 0.005$ . **G)** (Left) Polysome profiling of

824 HCT\_shNT and HCT\_shDHX30, revealed by the measurement of absorbance at a wavelength of 260 nm.  
825 (Right) Box plot of the relative quantification of the area under the curve of fractions corresponding to the  
826 polysomes related to the fractions corresponding to the ribosomal subunits and 80S monosome (POL/SUB,  
827 an estimate of translation efficiency). Data are mean  $\pm$  SD (n=7); \*p < 0.05.

828

829 **Figure 2. Cytoplasmic DHX30 modulates the expression of nuclear encoded mito-ribosome**  
830 **components MRPL11 and MRPS22.**

831 A) RNA immunoprecipitation experiments to study the binding of DHX30 to MRPL11 and MRPS22  
832 transcripts. Results obtained with a primary antibody targeting DHX30 (blue) or the control IgG control  
833 (grey) are plotted relative as % of input. Data are mean and individual points (n=2); p-value was calculated  
834 comparing the amount of each sample with the amount of *RNR1* mRNA; \*p < 0.05, \*\*\*p < 0.001. B)  
835 Relative mRNA levels of MRPL11 and MRPS22 in HCT116\_shDHX30 compared to the shNT control  
836 clone. Data are mean  $\pm$  SD (n=3); \*p < 0.05; \*\*p < 0.01. C) (Left) Protein levels of MRPL11 and MRPS22.  
837  $\beta$ -Tubulin was used as loading control. Immunoblots represent one of three independent experiments.  
838 (Right) MRPL11 and MRPS22 protein quantification in HCT116\_shDHX30 normalized on shNT control  
839 clone. Data are mean  $\pm$  SD (n=3); \*p < 0.05. D) Representative images of one of three independent  
840 immunofluorescence experiments to colocalize DHX30 (red) with MT-ATP6 (green, used as mitochondrial  
841 marker). Staining with Hoechst (blue) was used to visualize cells' nuclei. E) Relative mRNA levels of  
842 cytoplasmic DHX30 (cDHX30) and the mitochondrial variant (mDHX30, set to 1). Data are mean  $\pm$  SD  
843 (n=3); \*\*\*p < 0.001. F) Relative DHX30 protein levels in cytoplasm and mitochondria.  $\beta$ -Tubulin and MT-  
844 ATP6 are used as controls of cytoplasmic-mitochondrial fractionation and Ponceau-S staining is used as  
845 loading control. One of three independent experiments is shown.

846

847 **Figure 3. Transient DHX30 silencing leads to enhanced translation but reduced mitoribosome gene**  
848 **expression in HCT116 cells.**

849 A) qRT-PCR to verify the silencing of DHX30 transcripts in HCT116 96 hours after transient transfection  
850 with the indicated siRNAs. The relative mRNA levels of cytoplasmic (cDHX30) and mitochondrial  
851 (mDHX30) DHX30 transcripts as well as of total DHX30 (measured with a pair of primers common to all



annotated transcripts). Data are mean  $\pm$  SD (n=3); \*\*p < 0.01; \*\*\*p < 0.001. **B)** Global translation based on the fluorescence intensity of L-azidohomoalanine (AHA) incorporated in nascent proteins present in the cytoplasm. HCT116 were transiently transfected with the indicated siRNAs and tested after 96 hours. 5-Fluorouracil treatment was used as control treatment leading to translation inhibition. Data are mean  $\pm$  SD (n=3); \* p < 0.05; \*\*p < 0.01. **C)** mRNA levels of MRPL11 and MRPS22 in HCT116 silenced transiently for cytoplasmic DHX30 (HCT\_siDHX30-C) or for both cytoplasmic and mitochondrial variants (HCT\_siDHX30-C+M). Data are compared to the siRNA negative control (HCT\_siNC) and are mean  $\pm$  SD (n=3); \*p < 0.05. **D)** (Left) MRPL11 and MRPS22 protein levels in HCT116 silenced for cytoplasmic DHX30 (HCT\_siDHX30-C) or for both cytoplasmic and mitochondrial variants (HCT\_siDHX30-C+M). Immunoblot represents one of three independent experiments. (Right) MRPL11 and MRPS22 protein quantification in HCT116\_siDHX30-C and HCT116\_siDHX30-C+M normalized on  $\alpha$ -actinin and compared to siNC control. Data are mean  $\pm$  SD (n=3); \*p < 0.05.

**Figure 4. Depletion of DHX30 reduces the expression and function of mitochondrially encoded OXPHOS components.**

**A)** Relative mitochondrial genome copy number in HCT116\_shDHX30 and -shNT measured by droplet digital PCR. MT-RNR1 and MT-ATP8 were amplified along with the nuclear diploid marker gene CTDSP1. Bars plot mean  $\pm$  SD (n=3). **B)** Relative mRNA levels of mitochondrially encoded OXPHOS components in HCT116\_shDHX30 compared to HCT116\_shNT (dashed line, set to 1). For both upper and lower panel, data are mean  $\pm$  SD (n=3); \*p < 0.05; \*\*p < 0.01. **C)** Protein levels of MT-ATP6 and MT-ATP8 in mitochondrial lysates of HCT116\_shDHX30 and the shNT control clone. Ponceau-S was used as loading control. Immunoblots represent one of two independent qualitative comparisons. **D)** Relative mRNA levels of the indicated mitochondrially encoded OXPHOS components in HCT116 transiently silenced for DHX30 expression (siDHX30-C, siDHX30-C+M) compared to siNC (dashed line, set to 1). Data are mean  $\pm$  SD (n=3); \*p < 0.05; \*\*p < 0.01; \*\*\*p < 0.001. **E)** (Left) Protein levels of MT-ATP6 and MT-ATP8 in HCT116 transiently silenced as in D).  $\alpha$ -actinin was used as loading control. Immunoblots represent one of three independent experiments. (Right) MT-ATP6 and MT-ATP8 protein quantification in



880 HCT116\_siDHX30-C and HCT116\_siDHX30-C+M normalized on  $\alpha$ -actinin and compared to siNC  
 881 control. Data are mean  $\pm$  SD (n=3); \*\*p < 0.01; \*\*\*p < 0.001. **F)** (Left) Measurement of the oxygen  
 882 consumption rate (OCR) to evaluate mitochondrial respiration by Seahorse XF analyzer. Points before the  
 883 Rotenone/Antimycin-A (Rot/AA) treatment correspond to the basal mitochondrial respiration. (Right)  
 884 Extracellular acidification rate (ECAR) measurement was used as a means to measure glycolysis. Points  
 885 before and after the Rotenone/Antimycin-A (Rot/AA) treatment correspond respectively to basal and  
 886 compensatory glycolysis -in response to the block of mitochondrial respiration-. 2-Deoxyglucose (2-DG)  
 887 is then used to block glycolysis. For both panels, one of three independent replicates is presented. Data are  
 888 mean  $\pm$  SD (n=3 wells in the Seahorse cartridge); \*p < 0.05.

889

890 **Figure 5. Depletion of DHX30 reduces proliferation and survival in basal and treatment conditions**

891 **A)** (Left) Representative image of colony formation assays. (Right) Colony quantification by ImageJ  
 892 software. Data are mean  $\pm$  SD (n=3). **B)** Relative cell proliferation measured by high-content microscopy  
 893 in digital phase contrast. Data are mean  $\pm$  SD (n=3). **C)** Estimate of relative proliferation by an impedance-  
 894 based Real-Time Cell Analyzer. Data are mean  $\pm$  SD (n=3). **D)** Spheroid formation and growth assay. (Left)  
 895 A representative image at the indicated time points is shown in the left panel. (Right) Spheroid area  
 896 measured by ImageJ software. Data are mean  $\pm$  SD (n=3). **E)** (Left) Representative image of  
 897 HCT116\_shNT and shDHX30 cell cycle profiles. (Right) Quantification of cell cycle profile in HCT116  
 898 DHX30 depleted cells compared to shNT control. Data are mean  $\pm$  SD (n=3). **F)** Left panel: relative  
 899 expression of eIF2alpha and phospho-eIF2alpha in HCT116 cells stably depleted for DHX30 expression or  
 900 control. A representative immunodetection image is shown. Right panel: relative average protein  
 901 quantification and SD of three replicates is presented in the bar graph; n = 3, \*p < 0.05. **G)** Relative  
 902 proliferation measured as in B) but starting 24 hours after transient silencing DHX30 with the indicated  
 903 siRNAs. **H)** Relative expression of the annexin-V apoptosis markers in cells treated for 48 hours with the  
 904 indicated drugs or DMSO control. For all panels, data are mean  $\pm$  SD (n=3); \*p < 0.05; \*\*p < 0.01.

905

906 **Figure 6. DHX30 expression positively correlates with the expression of mitoribosomal protein**  
 907 **transcripts and can have prognostic significance.**

908 The table presents the expression correlation data (R value and p value) between DHX30 and the combined  
 909 group of 14 mitoribosomal protein transcripts is listed for each cancer type (see also Figure S6). Data from  
 910 Kaplan-Meier survival analysis for the aggregated 15-gene signature (DHX30 + the 14 mitoribosomal  
 911 protein transcripts) are shown. Significant differences are highlighted in bold font. The tumor type acronym  
 912 and extended name are also shown. The graphs below the table presents two examples among the cluster  
 913 of eleven cancer types where a positive correlation is apparent. Left panels: Pearson correlation. Right  
 914 panels: Overall Survival Kaplan-Meier. The correlation value, the Hazardous Ratio, p values and sample  
 915 sizes are shown.

916

917 Figure 1

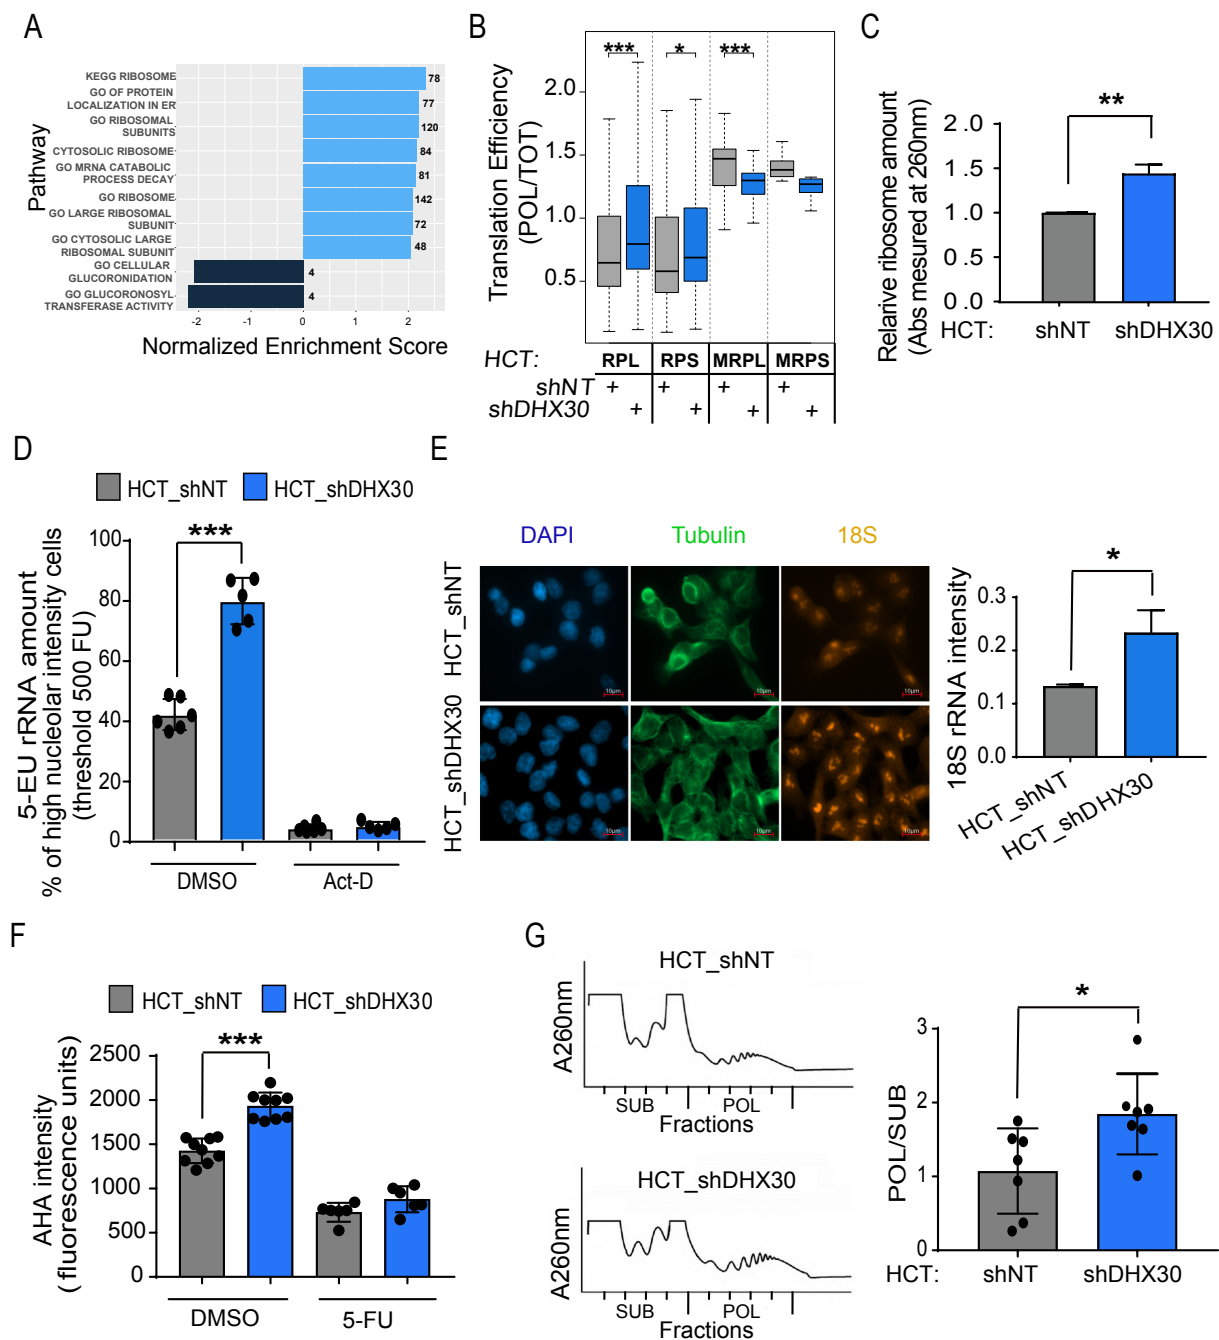

919 Figure 2

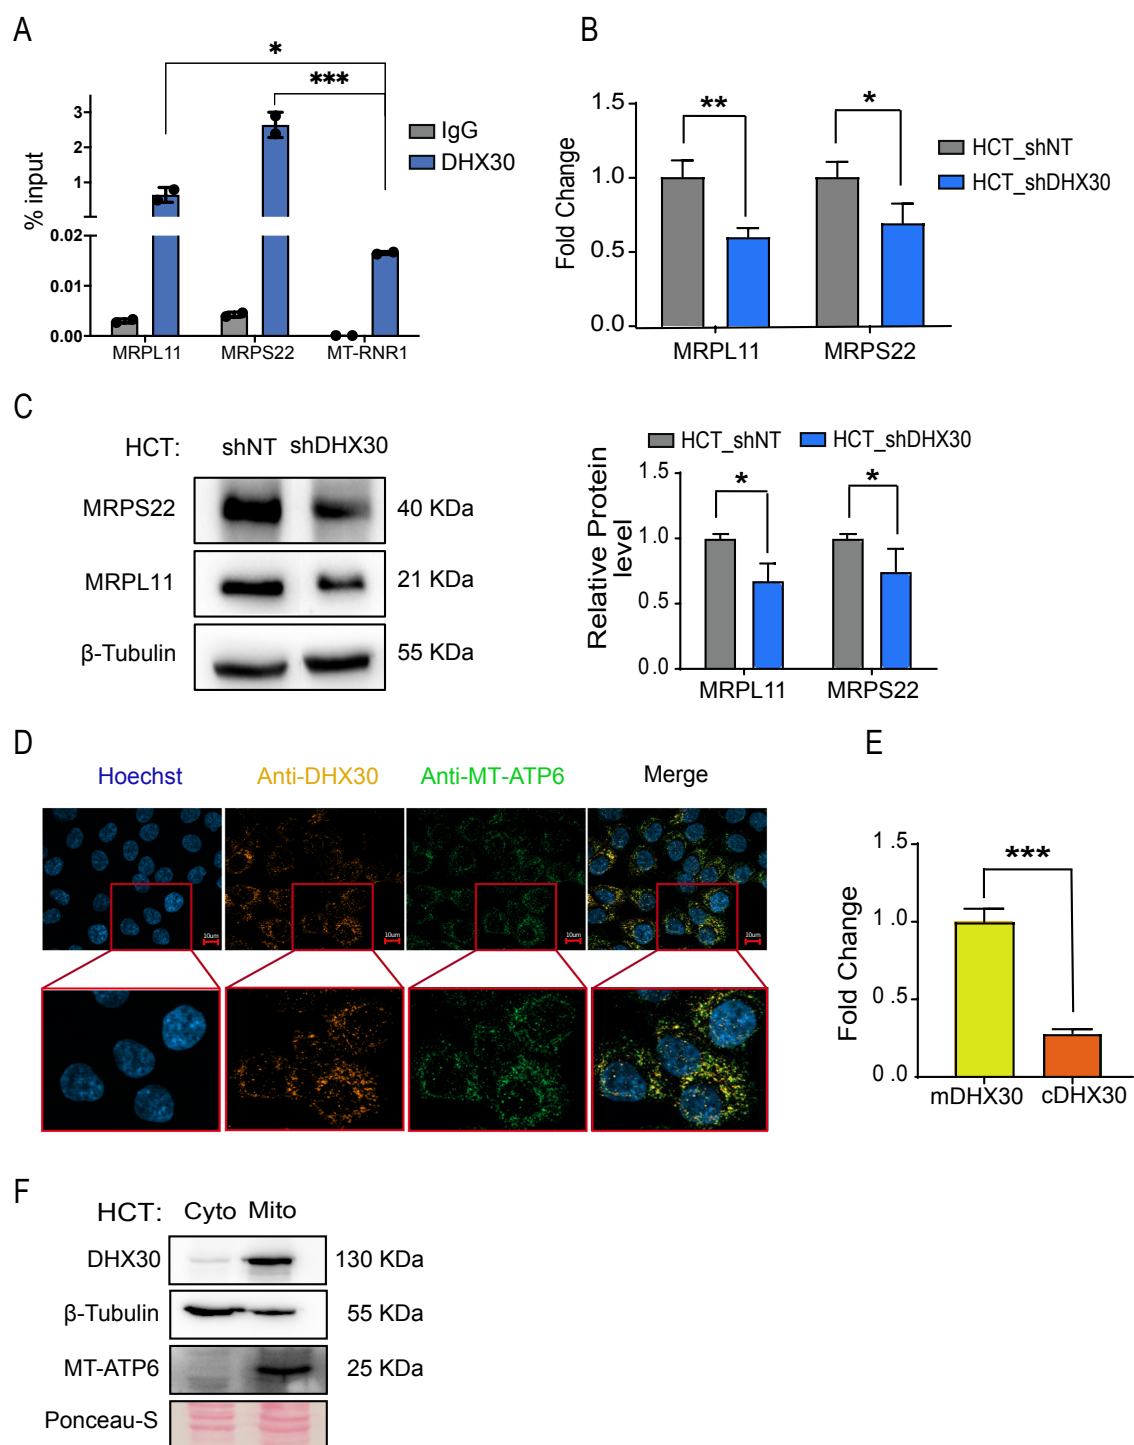

921 Figure 3

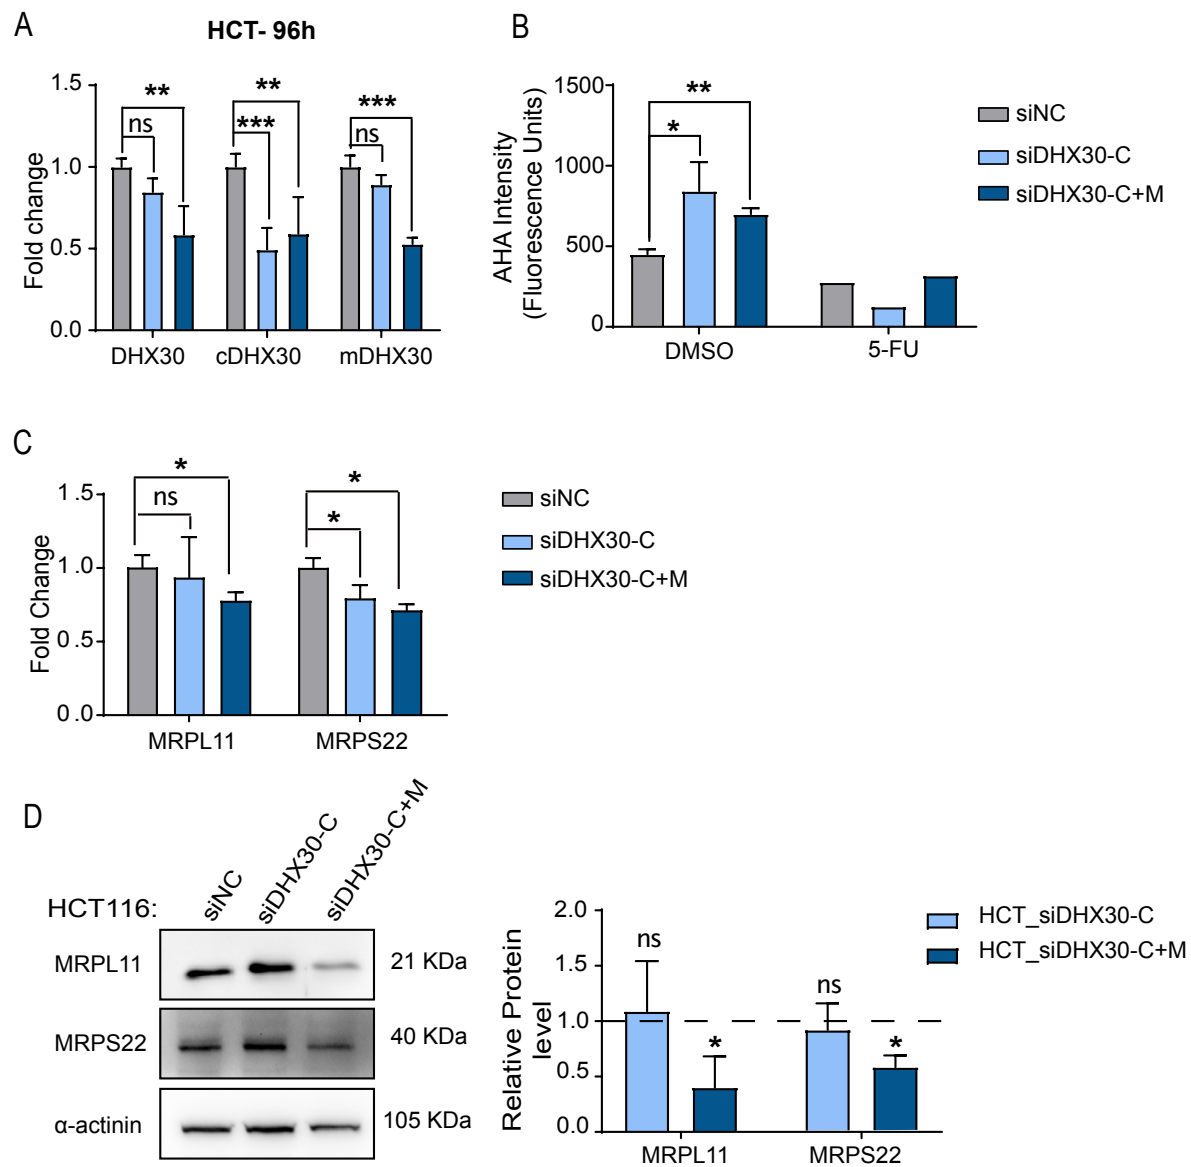

923 Figure 4

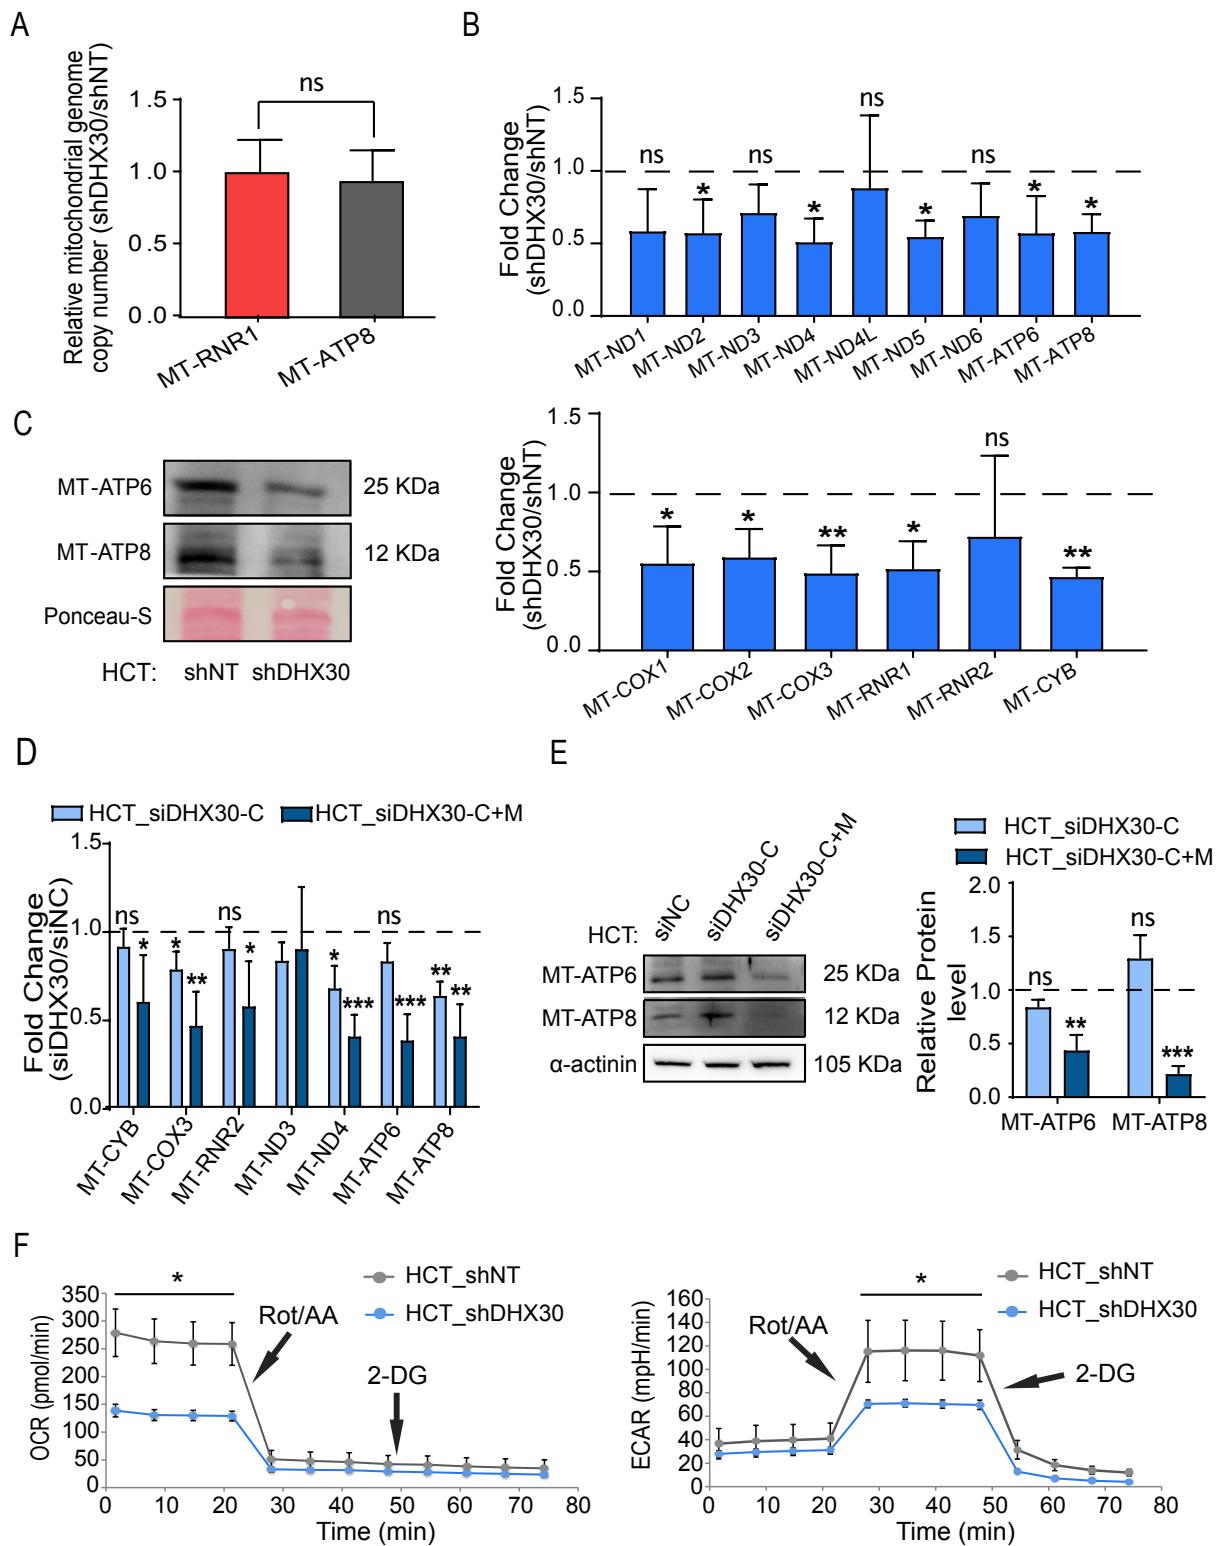

925 Figure 5

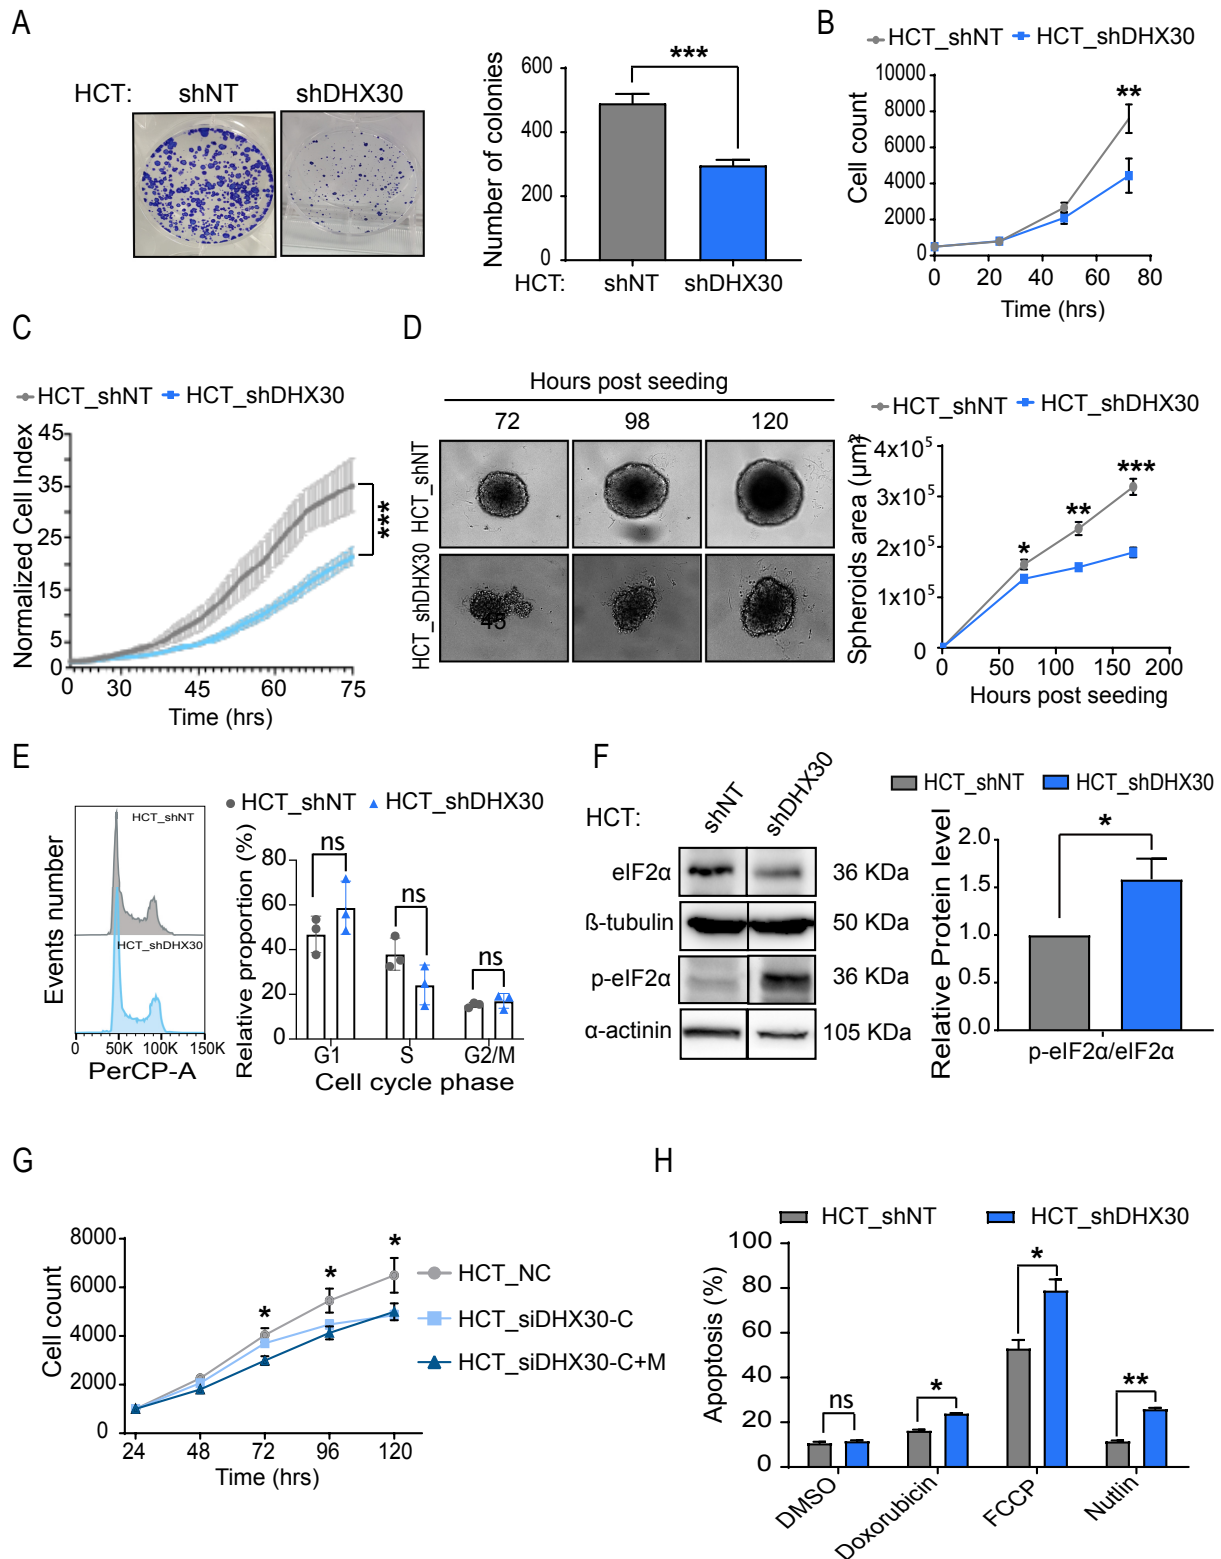

926

927



928 Figure 6

| Data extracted from the GEPIA2 web server <sup>^</sup> |            |                                     |          |           |                 |         |      |                                                                  |
|--------------------------------------------------------|------------|-------------------------------------|----------|-----------|-----------------|---------|------|------------------------------------------------------------------|
| clustering                                             | tumor type | Expression Correlation <sup>*</sup> |          | Outcome   |                 |         |      | tumor type name                                                  |
|                                                        |            | R                                   | p-value  | HR (high) | Logrank p value | p(HR)   | n    |                                                                  |
| Cluster1                                               | LAML       | 0.5                                 | 3.10E-12 | 2.4       | 0.016           | 0.02    | 54   | Acute Myeloid Leukemia                                           |
|                                                        | KIRC       | 0.39                                | 0        | 0.69      | 0.017           | 0.017   | 516  | Kidney renal clear cell carcinoma                                |
|                                                        | KIRP       | 0.44                                | 8.90E-15 | 0.87      | 0.65            | 0.65    | 282  | Kidney renal papillary cell carcinoma                            |
|                                                        | LIHC       | 0.49                                | 0        | 1.9       | 0.00027         | 0.00035 | 364  | Liver hepatocellular carcinoma                                   |
|                                                        | PRAD       | 0.44                                | 0        | 2.1       | 0.00063         | 0.00083 | 492  | Prostate adenocarcinoma                                          |
|                                                        | UCEC       | 0.4                                 | 5.70E-11 | 0.64      | 0.21            | 0.22    | 172  | Uterine Corpus Endometrial Carcinoma                             |
|                                                        | LGG        | 0.42                                | 0        | 1.7       | 0.0045          | 0.005   | 514  | Brain Lower Grade Glioma                                         |
|                                                        | PCPG       | 0.52                                | 3.60E-14 | 1.2       | 0.74            | 0.74    | 182  | Pheochromocytoma and Paraganglioma                               |
|                                                        | THCA       | 0.59                                | 0        | 0.66      | 0.16            | 0.16    | 510  | Thyroid carcinoma                                                |
|                                                        | ACC        | 0.67                                | 2.40E-11 | 3.3       | 0.0035          | 0.0055  | 76   | Adrenocortical carcinoma                                         |
| Cluster 2                                              | KICH       | 0.66                                | 1.70E-09 | 9.5       | 0.0096          | 0.0034  | 64   | Kidney Chromophobe                                               |
|                                                        | DLBC       | 0.37                                | 1.00E-02 | 0.65      | 0.56            | 0.56    | 46   | Lymphoid Neoplasm Diffuse Large B-cell Lymphoma                  |
|                                                        | THYM       | 0.21                                | 2.20E-02 | 1.5       | 0.37            | 0.37    | 119  | Thymoma                                                          |
|                                                        | GBM        | 0.13                                | 9.30E-02 | 0.98      | 0.86            | 0.9     | 162  | Glioblastoma multiforme                                          |
|                                                        | UVM        | 0.04                                | 7.30E-01 | 3         | 0.025           | 0.033   | 78   | Uveal Melanoma                                                   |
|                                                        | PAAD       | 0.41                                | 1.70E-08 | 1.3       | 0.21            | 0.22    | 178  | Pancreatic adenocarcinoma                                        |
|                                                        | ESCA       | 0.31                                | 2.30E-05 | 1         | 0.99            | 1       | 182  | Esophageal carcinoma                                             |
|                                                        | SKCM       | 0.44                                | 0.00E+00 | 1.4       | 0.027           | 0.028   | 458  | Skin Cutaneous Melanoma                                          |
|                                                        | OV         | 0.17                                | 3.70E-04 | 0.85      | 0.18            | 0.19    | 424  | Ovarian serous cystadenocarcinoma                                |
|                                                        | STAD       | 0.35                                | 3.00E-13 | 0.82      | 0.21            | 0.22    | 384  | Stomach adenocarcinoma                                           |
|                                                        | CESC       | 0.21                                | 3.10E-04 | 1.1       | 0.75            | 0.75    | 292  | Cervical squamous cell carcinoma and endocervical adenocarcinoma |
|                                                        | BLCA       | 0.31                                | 2.80E-10 | 1.1       | 0.63            | 0.63    | 402  | Bladder Urothelial Carcinoma                                     |
|                                                        | HNSC       | 0.22                                | 2.70E-07 | 1.1       | 0.32            | 0.33    | 518  | Head and Neck squamous cell carcinoma                            |
|                                                        | COAD       | 0.17                                | 4.90E-03 | 0.79      | 0.33            | 0.34    | 270  | Colon adenocarcinoma                                             |
|                                                        | READ       | 0.37                                | 2.80E-04 | 0.74      | 0.53            | 0.53    | 92   | Rectum adenocarcinoma                                            |
|                                                        | BRCA       | 0.22                                | 1.70E-13 | 1.3       | 0.13            | 0.13    | 1070 | Breast invasive carcinoma                                        |
|                                                        | LUAD       | 0.16                                | 6.10E-04 | 1.6       | 0.0027          | 0.003   | 478  | Lung adenocarcinoma                                              |
|                                                        | LUSC       | 0.2                                 | 6.80E-06 | 0.86      | 0.27            | 0.27    | 482  | Lung squamous cell carcinoma                                     |
|                                                        | TGCT       | 0.17                                | 5.40E-02 | 1.4       | 0.34            | 0.34    | 136  | Testicular Germ Cell Tumors                                      |
|                                                        | CHOL       | -0.16                               | 3.70E-01 | 1.1       | 0.79            | 0.8     | 36   | Cholangio carcinoma                                              |
|                                                        | MESO       | 0.05                                | 6.60E-01 | 1.5       | 0.097           | 0.098   | 82   | Mesothelioma                                                     |
|                                                        | SARC       | 0.12                                | 6.20E-02 | 1.3       | 0.25            | 0.25    | 262  | Sarcoma                                                          |
|                                                        | UCS        | 0.03                                | 8.50E-01 | 1.2       | 0.54            | 0.53    | 56   | Uterine Carcinosarcoma                                           |

<sup>^</sup> <http://gepia2.cancer-pku.cn/#index>

<sup>\*</sup> between DXH30 and 14 mitochondrial transcripts that are derived from the intersection of Translation Efficiency data, Leading Edge in significant terms in GSEA and DH30 eCLIP data in ENCODE: MRPL1, MRPL12, MRPL3, MRPL30, MRPL35, MRPL37, MRPL4, MRPL41, MRPL49, MRPL51, MRPS15, MRPS24, MRPS22, MRPL11

n refers to the total number of samples. These were split at median for the K-M analysis.

Number in italics indicate the DFS instead of OS data was used.

## ACC

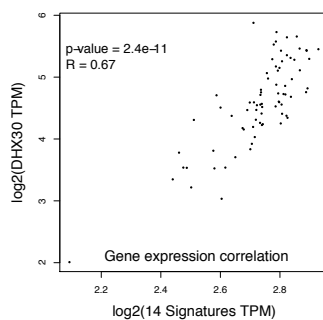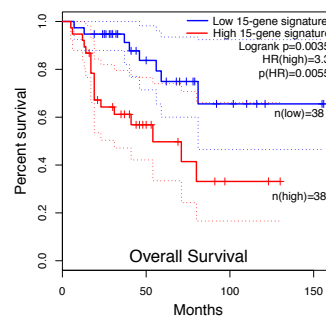

## LIHC

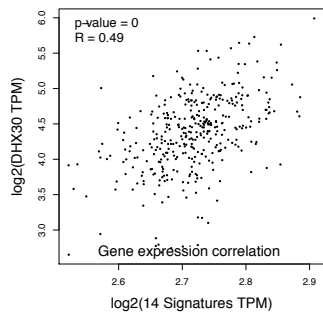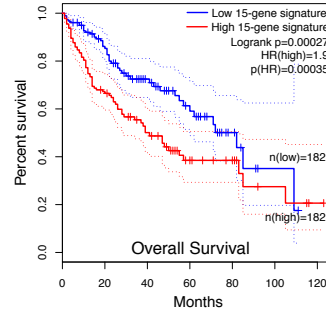

Source: http://biorxiv.org/content/10.1101/2020.07.13.196709v2.full.pdf
